# Supplementary material for: Genome-Wide Association Study for Chronic Hepatitis B Infection in the Thai Population
Source: Front Genet. 2022 Jun 13;13:887121. doi: 10.3389/fgene.2022.887121 (PMC9234442; doi:10.3389/fgene.2022.887121)
Supplement: Supplementary file 2 [file DataSheet2.xlsx]

## Sheet: Table S1
Table S1. Basic characteristics of cases and controls
Subjects	Chronic hepatitis B patients	Healthy controls
HBV serum markers	HBsAg(+) anti-HCV(-)	HBsAg(-) anti-HCV(-) anti-HBc(-)
Mean Age (min-max)	49 (17-86)	45 (33-51)
Gender (M/F)	171/147	155/154

## Sheet: Table S2
Table S2. GWAS results for SNPs with suggestive level of significance (p-value < 1E-05)
Chr	SNP	position	Allele 1	Allele 1 frequency in cases	Allele 1 frequency in controls	Allele 2	CHISQ	P-value	Odds Ratio	SE	L95	U95	Annotation
6	rs7770370	33048921	A	0.3396	0.5113	G	37.83	7.712e-10	0.4915	0.1161	0.3914	0.6171	Genotyped
6	rs743862	32381939	C	0.04088	0.1359	T	35.38	2.713e-09	0.271	0.2321	0.1719	0.4271	Genotyped
6	rs9357156	33041073	A	0.3239	0.4838	C	33.33	7.797e-09	0.5111	0.1169	0.4065	0.6427	Genotyped
6	rs3129293	33085010	G	0.4025	0.5615	A	31.73	1.77e-08	0.5261	0.1145	0.4204	0.6585	Genotyped
6	rs78857802:33049924:C:T	33049924	T	0.4624	0.3077	C	30.55	3.248e-08	1.935	0.1201	1.529	2.449	Imputed
6	rs6457714:33083096:T:A	33083096	T	0.3931	0.5453	A	29.17	6.626e-08	0.54	0.1145	0.4315	0.676	Imputed
6	rs6457715	33083188	A	0.3931	0.5453	G	29.17	6.626e-08	0.54	0.1145	0.4315	0.676	Genotyped
6	6:33070648:TAAA:TAA	33070648	TAAA	0.3722	0.5227	TAA	28.63	8.756e-08	0.5414	0.1151	0.432	0.6785	Imputed
6	rs4713607	33090836	A	0.3868	0.5372	G	28.54	9.162e-08	0.5434	0.1146	0.434	0.6802	Genotyped
6	rs56669692:33035634:G:A	33035634	G	0.2769	0.4204	A	27.09	1.94e-07	0.5278	0.1234	0.4144	0.6723	Imputed
6	rs2071351:33043930:A:G	33043930	A	0.2653	0.4057	G	26.95	2.089e-07	0.5288	0.1234	0.4152	0.6736	Imputed
6	rs9277726:33091613:G:T	33091613	T	0.2673	0.4042	G	26.35	2.851e-07	0.5377	0.1215	0.4237	0.6823	Imputed
6	rs35077312:33092197:G:GA	33092197	GA	0.3852	0.5291	G	26.17	3.134e-07	0.5576	0.1146	0.4454	0.698	Imputed
6	6:33087635:T:TGGCTAAGTAAA	33087635	TGGCTAAGTAAA	0.3852	0.5292	T	26.16	3.148e-07	0.5574	0.1147	0.4452	0.6979	Imputed
6	rs3117033:33088046:T:C	33088046	C	0.3852	0.5292	T	26.16	3.148e-07	0.5574	0.1147	0.4452	0.6979	Imputed
6	rs3129288:33088671:G:C	33088671	C	0.3852	0.5292	G	26.16	3.148e-07	0.5574	0.1147	0.4452	0.6979	Imputed
6	rs3130220:33088757:A:G	33088757	G	0.3852	0.5292	A	26.16	3.148e-07	0.5574	0.1147	0.4452	0.6979	Imputed
6	rs9277698:33089439:T:C	33089439	C	0.3852	0.5292	T	26.16	3.148e-07	0.5574	0.1147	0.4452	0.6979	Imputed
6	6:33057511:TA:T	33057511	TA	0.2683	0.4045	T	25.98	3.452e-07	0.5396	0.1217	0.4251	0.685	Imputed
6	rs9277457:33053026:C:G	33053026	C	0.283	0.4205	G	25.96	3.488e-07	0.5441	0.12	0.43	0.6884	Imputed
6	rs79289745:33031595:C:T	33031595	C	0.2698	0.4066	T	25.92	3.553e-07	0.5394	0.1219	0.4248	0.685	Imputed
6	rs9469329:33031602:C:T	33031602	C	0.2698	0.4066	T	25.92	3.553e-07	0.5394	0.1219	0.4248	0.685	Imputed
6	rs9277752	33094600	A	0.2673	0.4029	G	25.91	3.577e-07	0.5406	0.1215	0.4261	0.6859	Genotyped
6	rs67646359:33034305:C:T	33034305	C	0.269	0.4056	T	25.86	3.68e-07	0.5392	0.1221	0.4244	0.685	Imputed
6	rs9277480:33053812:A:G	33053812	A	0.294	0.432	G	25.85	3.692e-07	0.5475	0.119	0.4336	0.6914	Imputed
6	rs72870105:33035134:A:G	33035134	A	0.2684	0.4049	G	25.83	3.731e-07	0.5391	0.1222	0.4242	0.685	Imputed
6	rs74818705:33035158:G:C	33035158	G	0.2684	0.4049	C	25.83	3.731e-07	0.5391	0.1222	0.4242	0.685	Imputed
6	rs79229871:33035143:G:C	33035143	G	0.2684	0.4049	C	25.83	3.731e-07	0.5391	0.1222	0.4242	0.685	Imputed
6	rs9277535	33054861	A	0.2956	0.4337	G	25.82	3.753e-07	0.548	0.1189	0.4341	0.6919	Genotyped
6	rs9277749:33093901:C:T	33093901	T	0.2563	0.39	C	25.65	4.096e-07	0.5391	0.1227	0.4239	0.6856	Imputed
6	6:33048694:A:G	33048694	A	0.2587	0.3934	G	25.64	4.119e-07	0.5381	0.1231	0.4228	0.6849	Imputed
6	rs73739700:33038223:A:G	33038223	A	0.2643	0.3994	G	25.59	4.214e-07	0.5404	0.1223	0.4252	0.6868	Imputed
6	rs3135024:33047466:T:C	33047466	T	0.221	0.3517	C	25.55	4.316e-07	0.5229	0.1291	0.406	0.6736	Imputed
6	rs72879618:33038237:A:G	33038237	A	0.2653	0.4007	G	25.51	4.392e-07	0.5401	0.1226	0.4247	0.6868	Imputed
6	AX-11677603	33053820	A	0.283	0.4191	G	25.51	4.405e-07	0.5471	0.12	0.4325	0.6922	Genotyped
6	rs3091281	33056566	T	0.283	0.4191	C	25.51	4.405e-07	0.5471	0.12	0.4325	0.6922	Genotyped
6	rs3117229	33056069	G	0.283	0.4191	A	25.51	4.405e-07	0.5471	0.12	0.4325	0.6922	Genotyped
6	rs3128968:33056253:T:A	33056253	T	0.283	0.4191	A	25.51	4.405e-07	0.5471	0.12	0.4325	0.6922	Imputed
6	rs3130186	33056207	C	0.283	0.4191	T	25.51	4.405e-07	0.5471	0.12	0.4325	0.6922	Genotyped
6	rs374289517:33056157:AAC:A	33056157	AAC	0.283	0.4191	A	25.51	4.405e-07	0.5471	0.12	0.4325	0.6922	Imputed
6	rs9277464	33053352	C	0.283	0.4191	T	25.51	4.405e-07	0.5471	0.12	0.4325	0.6922	Genotyped
6	rs9277465:33053396:A:G	33053396	A	0.283	0.4191	G	25.51	4.405e-07	0.5471	0.12	0.4325	0.6922	Imputed
6	rs9277475:33053739:T:C	33053739	T	0.283	0.4191	C	25.51	4.405e-07	0.5471	0.12	0.4325	0.6922	Imputed
6	rs9277489	33053942	T	0.283	0.4191	C	25.51	4.405e-07	0.5471	0.12	0.4325	0.6922	Genotyped
6	rs9277557:33056694:T:C	33056694	T	0.283	0.4191	C	25.51	4.405e-07	0.5471	0.12	0.4325	0.6922	Imputed
6	rs3130187	33056405	C	0.2846	0.4207	T	25.47	4.489e-07	0.5477	0.1198	0.4331	0.6928	Genotyped
6	rs116108798:33029925:A:G	33029925	A	0.2708	0.407	G	25.39	4.677e-07	0.5412	0.1225	0.4257	0.688	Imputed
6	rs55763051:33029937:C:T	33029937	C	0.2708	0.407	T	25.39	4.677e-07	0.5412	0.1225	0.4257	0.688	Imputed
6	rs80087810:33029930:A:G	33029930	A	0.2708	0.407	G	25.39	4.677e-07	0.5412	0.1225	0.4257	0.688	Imputed
6	rs59419782:33035829:T:C	33035829	T	0.2658	0.3997	C	25.24	5.054e-07	0.5438	0.1219	0.4283	0.6906	Imputed
6	rs72870109:33035855:T:A	33035855	T	0.2658	0.3997	A	25.24	5.054e-07	0.5438	0.1219	0.4283	0.6906	Imputed
6	rs72870110:33035887:G:C	33035887	G	0.2658	0.3997	C	25.24	5.054e-07	0.5438	0.1219	0.4283	0.6906	Imputed
6	rs73400043:33035845:G:A	33035845	G	0.2658	0.3997	A	25.24	5.054e-07	0.5438	0.1219	0.4283	0.6906	Imputed
6	rs9469341:33035877:A:G	33035877	A	0.2658	0.3997	G	25.24	5.054e-07	0.5438	0.1219	0.4283	0.6906	Imputed
6	rs67144300:33026697:T:G	33026697	T	0.2635	0.3974	G	25.23	5.083e-07	0.5425	0.1224	0.4268	0.6896	Imputed
6	rs72873920:33026673:G:T	33026673	G	0.2635	0.3974	T	25.23	5.083e-07	0.5425	0.1224	0.4268	0.6896	Imputed
6	rs34687999:33026604:C:T	33026604	C	0.2611	0.3951	T	25.22	5.122e-07	0.5412	0.1229	0.4253	0.6886	Imputed
6	rs35593095:33026606:A:G	33026606	A	0.2611	0.3951	G	25.22	5.122e-07	0.5412	0.1229	0.4253	0.6886	Imputed
6	6:33048689:G:A	33048689	G	0.2587	0.3922	A	25.21	5.132e-07	0.541	0.123	0.4251	0.6885	Imputed
6	6:33048691:C:G	33048691	C	0.2587	0.3922	G	25.21	5.132e-07	0.541	0.123	0.4251	0.6885	Imputed
6	rs1042169:33048686:G:A	33048686	G	0.2587	0.3922	A	25.21	5.132e-07	0.541	0.123	0.4251	0.6885	Imputed
6	rs114721295:33034321:C:T	33034321	C	0.2747	0.4127	T	25.2	5.172e-07	0.539	0.1238	0.4229	0.6869	Imputed
6	rs115704968:33034322:A:G	33034322	A	0.2747	0.4127	G	25.2	5.172e-07	0.539	0.1238	0.4229	0.6869	Imputed
6	rs116106585:33034325:C:T	33034325	C	0.2747	0.4127	T	25.2	5.172e-07	0.539	0.1238	0.4229	0.6869	Imputed
6	rs9277558:33056711:C:T	33056711	C	0.2839	0.4191	T	25.12	5.396e-07	0.5496	0.12	0.4344	0.6953	Imputed
6	rs9277559:33056731:T:C	33056731	T	0.2839	0.4191	C	25.12	5.396e-07	0.5496	0.12	0.4344	0.6953	Imputed
6	rs9277562:33056762:C:T	33056762	C	0.2839	0.4191	T	25.12	5.396e-07	0.5496	0.12	0.4344	0.6953	Imputed
6	rs1042866:33032913:C:T	33032913	C	0.2689	0.403	T	25.11	5.412e-07	0.5449	0.1218	0.4291	0.6918	Imputed
6	rs111625758:33035000:G:A	33035000	G	0.2697	0.4036	A	25.04	5.625e-07	0.5458	0.1216	0.43	0.6927	Imputed
6	rs68150759:33034296:T:C	33034296	T	0.269	0.403	C	24.98	5.796e-07	0.5452	0.122	0.4292	0.6925	Imputed
6	rs9277377:33050203:C:G	33050203	C	0.2706	0.4042	G	24.96	5.865e-07	0.5467	0.1215	0.4309	0.6937	Imputed
6	rs68148632:33033849:T:C	33033849	T	0.2681	0.4016	C	24.92	5.966e-07	0.5458	0.1219	0.4298	0.6931	Imputed
6	rs59964828:33038187:T:C	33038187	T	0.2667	0.3997	C	24.87	6.144e-07	0.5462	0.1219	0.4301	0.6936	Imputed
6	rs73739699:33038193:T:G	33038193	T	0.2667	0.3997	G	24.87	6.144e-07	0.5462	0.1219	0.4301	0.6936	Imputed
6	rs55920303:33030261:C:T	33030261	C	0.2742	0.4088	T	24.87	6.147e-07	0.5463	0.1218	0.4303	0.6937	Imputed
6	rs56084986:33030284:T:C	33030284	T	0.2742	0.4088	C	24.87	6.147e-07	0.5463	0.1218	0.4303	0.6937	Imputed
6	rs67463587:33038322:G:T	33038322	G	0.2659	0.399	T	24.81	6.327e-07	0.5456	0.1223	0.4293	0.6933	Imputed
6	rs9277398:33051280:T:C	33051280	T	0.2594	0.3912	C	24.81	6.336e-07	0.5451	0.1225	0.4288	0.693	Imputed
6	rs9277510:33054208:C:T	33054208	C	0.2681	0.401	T	24.8	6.365e-07	0.5473	0.1216	0.4312	0.6947	Imputed
6	rs66696871:33033787:T:C	33033787	T	0.2683	0.4016	C	24.79	6.383e-07	0.5462	0.1221	0.4299	0.6938	Imputed
6	rs68085274:33033791:C:T	33033791	C	0.2683	0.4016	T	24.79	6.383e-07	0.5462	0.1221	0.4299	0.6938	Imputed
6	rs2395308	33026214	G	0.2689	0.4013	A	24.71	6.679e-07	0.5486	0.1214	0.4325	0.696	Genotyped
6	rs6899851	33034113	T	0.2689	0.4013	C	24.71	6.679e-07	0.5486	0.1214	0.4325	0.696	Genotyped
6	rs9277509	33054207	A	0.2689	0.4013	G	24.71	6.679e-07	0.5486	0.1214	0.4325	0.696	Genotyped
6	rs3128962:33052502:G:T	33052502	G	0.2666	0.399	T	24.69	6.741e-07	0.5474	0.1219	0.4311	0.6951	Imputed
6	rs9277516:33054280:T:C	33054280	T	0.2857	0.4223	C	24.67	6.808e-07	0.5472	0.122	0.4308	0.695	Imputed
6	rs67408707:33038144:C:T	33038144	C	0.2674	0.3997	T	24.62	6.982e-07	0.5483	0.1217	0.4319	0.696	Imputed
6	rs1042308:33036853:A:C	33036853	A	0.2689	0.401	C	24.56	7.221e-07	0.5494	0.1215	0.433	0.6971	Imputed
6	rs11479653:33026139:AT:A	33026139	AT	0.2689	0.401	A	24.56	7.221e-07	0.5494	0.1215	0.433	0.6971	Imputed
6	rs2894313:33026169:G:A	33026169	G	0.2689	0.401	A	24.56	7.221e-07	0.5494	0.1215	0.433	0.6971	Imputed
6	rs2894314:33026189:C:T	33026189	C	0.2689	0.401	T	24.56	7.221e-07	0.5494	0.1215	0.433	0.6971	Imputed
6	rs2894315:33026196:G:A	33026196	G	0.2689	0.401	A	24.56	7.221e-07	0.5494	0.1215	0.433	0.6971	Imputed
6	rs67247679:33034007:T:C	33034007	T	0.2689	0.401	C	24.56	7.221e-07	0.5494	0.1215	0.433	0.6971	Imputed
6	rs67635640:33030730:G:A	33030730	G	0.2689	0.401	A	24.56	7.221e-07	0.5494	0.1215	0.433	0.6971	Imputed
6	rs72879607:33036287:G:A	33036287	G	0.2689	0.401	A	24.56	7.221e-07	0.5494	0.1215	0.433	0.6971	Imputed
6	rs72879608:33036288:G:A	33036288	G	0.2689	0.401	A	24.56	7.221e-07	0.5494	0.1215	0.433	0.6971	Imputed
6	rs72879609:33036312:A:G	33036312	A	0.2689	0.401	G	24.56	7.221e-07	0.5494	0.1215	0.433	0.6971	Imputed
6	rs73400033:33035020:C:A	33035020	C	0.2689	0.401	A	24.56	7.221e-07	0.5494	0.1215	0.433	0.6971	Imputed
3	rs35766154:146275555:T:C	146275555	C	0.09464	0.1928	T	24.51	7.39e-07	0.4376	0.17	0.3136	0.6107	Imputed
6	rs68071176:33036388:C:T	33036388	C	0.2716	0.4046	T	24.43	7.709e-07	0.5486	0.1221	0.4319	0.6969	Imputed
6	rs73400048:33036394:G:A	33036394	G	0.2716	0.4046	A	24.43	7.709e-07	0.5486	0.1221	0.4319	0.6969	Imputed
6	rs147455677:33030372:CTTTG:C	33030372	CTTTG	0.2707	0.4033	C	24.38	7.919e-07	0.5492	0.122	0.4324	0.6976	Imputed
6	rs2071365:33032788:C:A	33032788	C	0.2681	0.3997	A	24.38	7.926e-07	0.5503	0.1216	0.4336	0.6984	Imputed
6	rs35835875:33034421:A:G	33034421	A	0.2681	0.3997	G	24.38	7.926e-07	0.5503	0.1216	0.4336	0.6984	Imputed
6	rs361527:33032920:G:GTCAACATTTAT	33032920	G	0.2681	0.3997	GTCAACATTTAT	24.38	7.926e-07	0.5503	0.1216	0.4336	0.6984	Imputed
6	rs6920457:33034399:C:A	33034399	C	0.2681	0.3997	A	24.38	7.926e-07	0.5503	0.1216	0.4336	0.6984	Imputed
6	rs72867696:33034404:G:A	33034404	G	0.2681	0.3997	A	24.38	7.926e-07	0.5503	0.1216	0.4336	0.6984	Imputed
6	rs72873917:33026540:G:A	33026540	G	0.2681	0.3997	A	24.38	7.926e-07	0.5503	0.1216	0.4336	0.6984	Imputed
6	rs72873934:33029775:A:G	33029775	A	0.2658	0.3974	G	24.36	7.994e-07	0.549	0.1221	0.4322	0.6975	Imputed
6	rs9277386:33050499:A:G	33050499	A	0.2627	0.3941	G	24.33	8.116e-07	0.5478	0.1226	0.4308	0.6967	Imputed
6	rs116733694:33031467:A:G	33031467	A	0.2742	0.4085	G	24.3	8.229e-07	0.5471	0.123	0.4299	0.6962	Imputed
6	rs9469327:33031468:C:T	33031468	C	0.2742	0.4085	T	24.3	8.229e-07	0.5471	0.123	0.4299	0.6962	Imputed
6	rs66468505:33035395:A:G	33035395	A	0.2714	0.4036	G	24.29	8.305e-07	0.5505	0.1217	0.4337	0.6989	Imputed
6	rs67012450:33035398:T:G	33035398	T	0.2714	0.4036	G	24.29	8.305e-07	0.5505	0.1217	0.4337	0.6989	Imputed
6	rs67225060:33035363:C:G	33035363	C	0.2714	0.4036	G	24.29	8.305e-07	0.5505	0.1217	0.4337	0.6989	Imputed
6	rs35528007:33033608:T:TG	33033608	T	0.269	0.4007	TG	24.28	8.35e-07	0.5505	0.1218	0.4336	0.6988	Imputed
6	rs66468857:33030484:T:A	33030484	T	0.269	0.4007	A	24.28	8.35e-07	0.5505	0.1218	0.4336	0.6988	Imputed
6	rs67396419:33030511:C:G	33030511	C	0.269	0.4007	G	24.28	8.35e-07	0.5505	0.1218	0.4336	0.6988	Imputed
6	rs67408908:33030470:G:T	33030470	G	0.269	0.4007	T	24.28	8.35e-07	0.5505	0.1218	0.4336	0.6988	Imputed
6	rs72873936:33030449:T:C	33030449	T	0.269	0.4007	C	24.28	8.35e-07	0.5505	0.1218	0.4336	0.6988	Imputed
6	rs9469325:33030441:C:A	33030441	C	0.269	0.4007	A	24.28	8.35e-07	0.5505	0.1218	0.4336	0.6988	Imputed
6	rs55950816:33029827:G:C	33029827	G	0.2666	0.3977	C	24.27	8.387e-07	0.5504	0.1218	0.4334	0.6988	Imputed
6	rs1054026:33035518:G:C	33035518	G	0.2689	0.4003	C	24.25	8.442e-07	0.5509	0.1217	0.434	0.6992	Imputed
6	rs1054030:33035514:A:G	33035514	A	0.2689	0.4003	G	24.25	8.442e-07	0.5509	0.1217	0.434	0.6992	Imputed
6	rs1054031:33035513:C:G	33035513	C	0.2689	0.4003	G	24.25	8.442e-07	0.5509	0.1217	0.434	0.6992	Imputed
6	rs59344176:33035630:CAA:C	33035630	CAA	0.2689	0.4003	C	24.25	8.442e-07	0.5509	0.1217	0.434	0.6992	Imputed
6	rs76589166:33034120:C:T	33034120	C	0.2706	0.4023	T	24.23	8.528e-07	0.5511	0.1216	0.4343	0.6995	Imputed
6	rs77527547:33034118:A:G	33034118	A	0.2706	0.4023	G	24.23	8.528e-07	0.5511	0.1216	0.4343	0.6995	Imputed
6	rs6923131:33029729:G:A	33029729	G	0.2681	0.3994	A	24.23	8.571e-07	0.5511	0.1217	0.4341	0.6995	Imputed
6	rs72870107:33035330:G:A	33035330	G	0.2776	0.4117	A	24.22	8.601e-07	0.5492	0.1224	0.4321	0.698	Imputed
6	rs67632751:33026517:C:T	33026517	C	0.2698	0.4013	T	24.2	8.679e-07	0.5514	0.1216	0.4344	0.6998	Imputed
6	rs73415240:33026524:T:C	33026524	T	0.2698	0.4013	C	24.2	8.679e-07	0.5514	0.1216	0.4344	0.6998	Imputed
6	rs2395307:33026212:T:G	33026212	T	0.2697	0.401	G	24.18	8.755e-07	0.5518	0.1215	0.4348	0.7001	Imputed
6	rs72873942:33030932:A:T	33030932	A	0.2697	0.401	T	24.18	8.755e-07	0.5518	0.1215	0.4348	0.7001	Imputed
6	rs72873943:33030933:T:C	33030933	T	0.2697	0.401	C	24.18	8.755e-07	0.5518	0.1215	0.4348	0.7001	Imputed
6	rs73740453:33030945:G:T	33030945	G	0.2697	0.401	T	24.18	8.755e-07	0.5518	0.1215	0.4348	0.7001	Imputed
6	rs73740455:33030946:A:G	33030946	A	0.2697	0.401	G	24.18	8.755e-07	0.5518	0.1215	0.4348	0.7001	Imputed
6	rs9277418	33051749	C	0.2673	0.3981	T	24.18	8.795e-07	0.5517	0.1216	0.4347	0.7001	Genotyped
6	6:33032127:A:ATAAAAAG	33032127	A	0.2689	0.3997	ATAAAAAG	24.13	8.985e-07	0.5524	0.1214	0.4354	0.7008	Imputed
6	6:33032130:A:AC	33032130	A	0.2689	0.3997	AC	24.13	8.985e-07	0.5524	0.1214	0.4354	0.7008	Imputed
6	rs10214910	33037675	C	0.2689	0.3997	A	24.13	8.985e-07	0.5524	0.1214	0.4354	0.7008	Genotyped
6	rs1042178:33037522:T:C	33037522	T	0.2689	0.3997	C	24.13	8.985e-07	0.5524	0.1214	0.4354	0.7008	Imputed
6	rs1042434:33036505:G:C	33036505	G	0.2689	0.3997	C	24.13	8.985e-07	0.5524	0.1214	0.4354	0.7008	Imputed
6	rs1042688:33033055:A:T	33033055	A	0.2689	0.3997	T	24.13	8.985e-07	0.5524	0.1214	0.4354	0.7008	Imputed
6	rs1042901:33032865:A:C	33032865	A	0.2689	0.3997	C	24.13	8.985e-07	0.5524	0.1214	0.4354	0.7008	Imputed
6	rs1042926:33032822:G:A	33032822	G	0.2689	0.3997	A	24.13	8.985e-07	0.5524	0.1214	0.4354	0.7008	Imputed
6	rs1062658:33035925:A:T	33035925	A	0.2689	0.3997	T	24.13	8.985e-07	0.5524	0.1214	0.4354	0.7008	Imputed
6	rs17214519:33032188:G:A	33032188	G	0.2689	0.3997	A	24.13	8.985e-07	0.5524	0.1214	0.4354	0.7008	Imputed
6	rs17214533	33032272	C	0.2689	0.3997	T	24.13	8.985e-07	0.5524	0.1214	0.4354	0.7008	Genotyped
6	rs17214540:33032277:A:G	33032277	A	0.2689	0.3997	G	24.13	8.985e-07	0.5524	0.1214	0.4354	0.7008	Imputed
6	rs17214555:33032430:A:C	33032430	A	0.2689	0.3997	C	24.13	8.985e-07	0.5524	0.1214	0.4354	0.7008	Imputed
6	rs17214562:33032585:A:C	33032585	A	0.2689	0.3997	C	24.13	8.985e-07	0.5524	0.1214	0.4354	0.7008	Imputed
6	rs17214567:33032600:A:G	33032600	A	0.2689	0.3997	G	24.13	8.985e-07	0.5524	0.1214	0.4354	0.7008	Imputed
6	rs17214573	33032668	A	0.2689	0.3997	G	24.13	8.985e-07	0.5524	0.1214	0.4354	0.7008	Genotyped
6	rs17214580:33032692:C:T	33032692	C	0.2689	0.3997	T	24.13	8.985e-07	0.5524	0.1214	0.4354	0.7008	Imputed
6	rs17214587:33032698:G:T	33032698	G	0.2689	0.3997	T	24.13	8.985e-07	0.5524	0.1214	0.4354	0.7008	Imputed
6	rs17214594:33032703:C:T	33032703	C	0.2689	0.3997	T	24.13	8.985e-07	0.5524	0.1214	0.4354	0.7008	Imputed
6	rs17220927	33032347	T	0.2689	0.3997	G	24.13	8.985e-07	0.5524	0.1214	0.4354	0.7008	Genotyped
6	rs17220934:33032358:A:T	33032358	A	0.2689	0.3997	T	24.13	8.985e-07	0.5524	0.1214	0.4354	0.7008	Imputed
6	rs17220961	33032636	A	0.2689	0.3997	G	24.13	8.985e-07	0.5524	0.1214	0.4354	0.7008	Genotyped
6	rs17220968	33032663	G	0.2689	0.3997	A	24.13	8.985e-07	0.5524	0.1214	0.4354	0.7008	Genotyped
6	rs200365821:33035099:C:CA	33035099	C	0.2689	0.3997	CA	24.13	8.985e-07	0.5524	0.1214	0.4354	0.7008	Imputed
6	rs2395310	33026316	C	0.2689	0.3997	T	24.13	8.985e-07	0.5524	0.1214	0.4354	0.7008	Genotyped
6	rs3077	33033022	A	0.2689	0.3997	G	24.13	8.985e-07	0.5524	0.1214	0.4354	0.7008	Genotyped
6	rs3179779	33035969	A	0.2689	0.3997	G	24.13	8.985e-07	0.5524	0.1214	0.4354	0.7008	Genotyped
6	rs3180553:33036210:G:T	33036210	G	0.2689	0.3997	T	24.13	8.985e-07	0.5524	0.1214	0.4354	0.7008	Imputed
6	rs3180554	33036177	A	0.2689	0.3997	G	24.13	8.985e-07	0.5524	0.1214	0.4354	0.7008	Genotyped
6	rs3180555:33036116:T:G	33036116	T	0.2689	0.3997	G	24.13	8.985e-07	0.5524	0.1214	0.4354	0.7008	Imputed
6	rs3211475:33033058:T:C	33033058	T	0.2689	0.3997	C	24.13	8.985e-07	0.5524	0.1214	0.4354	0.7008	Imputed
6	rs34370305:33036617:C:T	33036617	C	0.2689	0.3997	T	24.13	8.985e-07	0.5524	0.1214	0.4354	0.7008	Imputed
6	rs34562515:33037279:A:G	33037279	A	0.2689	0.3997	G	24.13	8.985e-07	0.5524	0.1214	0.4354	0.7008	Imputed
6	rs34682523:33037304:G:T	33037304	G	0.2689	0.3997	T	24.13	8.985e-07	0.5524	0.1214	0.4354	0.7008	Imputed
6	rs34740152:33031691:G:C	33031691	G	0.2689	0.3997	C	24.13	8.985e-07	0.5524	0.1214	0.4354	0.7008	Imputed
6	rs34742617:33033235:G:C	33033235	G	0.2689	0.3997	C	24.13	8.985e-07	0.5524	0.1214	0.4354	0.7008	Imputed
6	rs34950776	33037104	C	0.2689	0.3997	T	24.13	8.985e-07	0.5524	0.1214	0.4354	0.7008	Genotyped
6	rs35947638:33036717:C:G	33036717	C	0.2689	0.3997	G	24.13	8.985e-07	0.5524	0.1214	0.4354	0.7008	Imputed
6	rs36081724:33037265:C:A	33037265	C	0.2689	0.3997	A	24.13	8.985e-07	0.5524	0.1214	0.4354	0.7008	Imputed
6	rs4247257	33041226	C	0.2689	0.3997	T	24.13	8.985e-07	0.5524	0.1214	0.4354	0.7008	Genotyped
6	rs55814661:33030218:C:T	33030218	C	0.2689	0.3997	T	24.13	8.985e-07	0.5524	0.1214	0.4354	0.7008	Imputed
6	rs56348503:33030099:G:A	33030099	G	0.2689	0.3997	A	24.13	8.985e-07	0.5524	0.1214	0.4354	0.7008	Imputed
6	rs66636430:33031819:C:T	33031819	C	0.2689	0.3997	T	24.13	8.985e-07	0.5524	0.1214	0.4354	0.7008	Imputed
6	rs66882283:33031986:A:C	33031986	A	0.2689	0.3997	C	24.13	8.985e-07	0.5524	0.1214	0.4354	0.7008	Imputed
6	rs66948925:33031809:T:C	33031809	T	0.2689	0.3997	C	24.13	8.985e-07	0.5524	0.1214	0.4354	0.7008	Imputed
6	rs67012664:33030585:C:T	33030585	C	0.2689	0.3997	T	24.13	8.985e-07	0.5524	0.1214	0.4354	0.7008	Imputed
6	rs67201607:33037142:A:G	33037142	A	0.2689	0.3997	G	24.13	8.985e-07	0.5524	0.1214	0.4354	0.7008	Imputed
6	rs67476989:33036242:T:C	33036242	T	0.2689	0.3997	C	24.13	8.985e-07	0.5524	0.1214	0.4354	0.7008	Imputed
6	rs67511993:33030787:T:C	33030787	T	0.2689	0.3997	C	24.13	8.985e-07	0.5524	0.1214	0.4354	0.7008	Imputed
6	rs67514692:33031994:T:C	33031994	T	0.2689	0.3997	C	24.13	8.985e-07	0.5524	0.1214	0.4354	0.7008	Imputed
6	rs67516795:33036233:A:G	33036233	A	0.2689	0.3997	G	24.13	8.985e-07	0.5524	0.1214	0.4354	0.7008	Imputed
6	rs67697941:33032394:G:GA	33032394	G	0.2689	0.3997	GA	24.13	8.985e-07	0.5524	0.1214	0.4354	0.7008	Imputed
6	rs67733930:33033630:C:T	33033630	C	0.2689	0.3997	T	24.13	8.985e-07	0.5524	0.1214	0.4354	0.7008	Imputed
6	rs67818943:33036085:C:G	33036085	C	0.2689	0.3997	G	24.13	8.985e-07	0.5524	0.1214	0.4354	0.7008	Imputed
6	rs67844630:33035149:TA:T	33035149	TA	0.2689	0.3997	T	24.13	8.985e-07	0.5524	0.1214	0.4354	0.7008	Imputed
6	rs67934954:33030620:T:G	33030620	T	0.2689	0.3997	G	24.13	8.985e-07	0.5524	0.1214	0.4354	0.7008	Imputed
6	rs6919972:33034177:A:G	33034177	A	0.2689	0.3997	G	24.13	8.985e-07	0.5524	0.1214	0.4354	0.7008	Imputed
6	rs72867687:33033266:T:A	33033266	T	0.2689	0.3997	A	24.13	8.985e-07	0.5524	0.1214	0.4354	0.7008	Imputed
6	rs72867689:33033267:G:A	33033267	G	0.2689	0.3997	A	24.13	8.985e-07	0.5524	0.1214	0.4354	0.7008	Imputed
6	rs72867694:33034240:A:C	33034240	A	0.2689	0.3997	C	24.13	8.985e-07	0.5524	0.1214	0.4354	0.7008	Imputed
6	rs72873946:33031934:C:T	33031934	C	0.2689	0.3997	T	24.13	8.985e-07	0.5524	0.1214	0.4354	0.7008	Imputed
6	rs73415237:33026423:C:T	33026423	C	0.2689	0.3997	T	24.13	8.985e-07	0.5524	0.1214	0.4354	0.7008	Imputed
6	rs73739662:33036630:G:T	33036630	G	0.2689	0.3997	T	24.13	8.985e-07	0.5524	0.1214	0.4354	0.7008	Imputed
6	rs73739663:33036631:A:C	33036631	A	0.2689	0.3997	C	24.13	8.985e-07	0.5524	0.1214	0.4354	0.7008	Imputed
6	rs77350016:33036708:C:T	33036708	C	0.2689	0.3997	T	24.13	8.985e-07	0.5524	0.1214	0.4354	0.7008	Imputed
6	rs77981473:33036709:A:G	33036709	A	0.2689	0.3997	G	24.13	8.985e-07	0.5524	0.1214	0.4354	0.7008	Imputed
6	rs8486:33032968:G:A	33032968	G	0.2689	0.3997	A	24.13	8.985e-07	0.5524	0.1214	0.4354	0.7008	Imputed
6	rs9469332	33034876	T	0.2689	0.3997	C	24.13	8.985e-07	0.5524	0.1214	0.4354	0.7008	Genotyped
6	rs9469334:33034992:A:C	33034992	A	0.2689	0.3997	C	24.13	8.985e-07	0.5524	0.1214	0.4354	0.7008	Imputed
6	rs68141899:33034079:A:G	33034079	A	0.2706	0.402	G	24.09	9.209e-07	0.5519	0.1217	0.4347	0.7006	Imputed
6	rs68172213:33034076:C:T	33034076	C	0.2706	0.402	T	24.09	9.209e-07	0.5519	0.1217	0.4347	0.7006	Imputed
6	rs72867695:33034354:T:C	33034354	T	0.2686	0.4013	C	24.07	9.271e-07	0.5478	0.1233	0.4302	0.6975	Imputed
6	rs9277361	33050045	T	0.272	0.4029	C	24.05	9.367e-07	0.5537	0.1211	0.4367	0.7021	Genotyped
6	rs9277378	33050279	A	0.272	0.4029	G	24.05	9.367e-07	0.5537	0.1211	0.4367	0.7021	Genotyped
6	rs11967655:33033738:C:T	33033738	C	0.2681	0.3993	T	24.04	9.436e-07	0.5511	0.1221	0.4338	0.7001	Imputed
6	rs116487412:33034931:A:G	33034931	A	0.2716	0.4033	G	24	9.616e-07	0.5516	0.122	0.4343	0.7007	Imputed
6	rs72867701:33034930:A:G	33034930	A	0.2716	0.4033	G	24	9.616e-07	0.5516	0.122	0.4343	0.7007	Imputed
6	rs1126542:33037424:T:C	33037424	T	0.2689	0.3994	C	23.98	9.713e-07	0.5531	0.1215	0.4359	0.7019	Imputed
6	rs1126543:33037419:G:A	33037419	G	0.2689	0.3994	A	23.98	9.713e-07	0.5531	0.1215	0.4359	0.7019	Imputed
6	rs66717880:33035436:G:A	33035436	G	0.2706	0.4013	A	23.96	9.827e-07	0.5534	0.1215	0.4362	0.7022	Imputed
6	rs9277374:33050185:C:A	33050185	C	0.2732	0.4053	A	23.95	9.865e-07	0.5514	0.1222	0.434	0.7007	Imputed
6	rs202154495:33030761:C:CATTT	33030761	C	0.2704	0.401	CATTT	23.95	9.909e-07	0.5538	0.1214	0.4366	0.7025	Imputed
6	rs67714479:33030755:T:C	33030755	T	0.2704	0.401	C	23.95	9.909e-07	0.5538	0.1214	0.4366	0.7025	Imputed
6	rs113777417:33031448:A:C	33031448	A	0.2751	0.4085	C	23.93	1.001e-06	0.5495	0.123	0.4318	0.6993	Imputed
6	rs199885949:33031442:T:C	33031442	T	0.2751	0.4085	C	23.93	1.001e-06	0.5495	0.123	0.4318	0.6993	Imputed
6	rs66518139:33033919:A:C	33033919	A	0.2658	0.3964	C	23.9	1.017e-06	0.5514	0.1224	0.4338	0.7009	Imputed
6	rs66967466:33033961:G:T	33033961	G	0.2658	0.3964	T	23.9	1.017e-06	0.5514	0.1224	0.4338	0.7009	Imputed
6	rs67530640:33033952:C:G	33033952	C	0.2658	0.3964	G	23.9	1.017e-06	0.5514	0.1224	0.4338	0.7009	Imputed
6	rs68076625:33033894:C:T	33033894	C	0.2658	0.3964	T	23.9	1.017e-06	0.5514	0.1224	0.4338	0.7009	Imputed
6	rs72867693:33033939:T:A	33033939	T	0.2658	0.3964	A	23.9	1.017e-06	0.5514	0.1224	0.4338	0.7009	Imputed
6	rs9277421	33051820	G	0.2799	0.411	A	23.87	1.033e-06	0.557	0.1204	0.4399	0.7051	Genotyped
6	rs9277513	33054231	C	0.2799	0.411	T	23.87	1.033e-06	0.557	0.1204	0.4399	0.7051	Genotyped
6	rs111595178:33033703:G:A	33033703	G	0.2697	0.4007	A	23.86	1.037e-06	0.5525	0.1221	0.4349	0.7018	Imputed
6	rs76416353:33033699:G:T	33033699	G	0.2697	0.4007	T	23.86	1.037e-06	0.5525	0.1221	0.4349	0.7018	Imputed
6	rs9277445:33052492:G:C	33052492	G	0.2666	0.3964	C	23.85	1.041e-06	0.5533	0.1218	0.4358	0.7025	Imputed
6	rs9277446:33052498:G:C	33052498	G	0.2666	0.3964	C	23.85	1.041e-06	0.5533	0.1218	0.4358	0.7025	Imputed
6	rs17214526:33032206:T:C	33032206	T	0.2689	0.399	C	23.83	1.05e-06	0.5539	0.1216	0.4364	0.7029	Imputed
6	rs17220899:33032096:T:C	33032096	T	0.2689	0.399	C	23.83	1.05e-06	0.5539	0.1216	0.4364	0.7029	Imputed
6	rs17220913:33032159:A:C	33032159	A	0.2689	0.399	C	23.83	1.05e-06	0.5539	0.1216	0.4364	0.7029	Imputed
6	rs67597807:33033287:G:C	33033287	G	0.2689	0.399	C	23.83	1.05e-06	0.5539	0.1216	0.4364	0.7029	Imputed
6	rs73740460:33032136:G:A	33032136	G	0.2689	0.399	A	23.83	1.05e-06	0.5539	0.1216	0.4364	0.7029	Imputed
6	rs9277517	33054281	G	0.2814	0.4126	A	23.83	1.052e-06	0.5576	0.1202	0.4405	0.7057	Genotyped
6	rs2071353:33044257:T:C	33044257	T	0.2816	0.4153	C	23.82	1.059e-06	0.5518	0.1224	0.4342	0.7015	Imputed
3	rs80053473:146273752:T:C	146273752	C	0.09464	0.1912	T	23.81	1.062e-06	0.4422	0.1702	0.3168	0.6174	Imputed
6	6:33056396:T:TGGGG	33056396	T	0.2808	0.4121	TGGGG	23.78	1.078e-06	0.557	0.1206	0.4398	0.7054	Imputed
6	6:33029363:A:T	33029363	A	0.2697	0.3997	T	23.77	1.088e-06	0.5547	0.1215	0.4372	0.7038	Imputed
6	rs1042908:33032861:G:A	33032861	G	0.2697	0.3997	A	23.77	1.088e-06	0.5547	0.1215	0.4372	0.7038	Imputed
6	rs1042920:33032831:G:A	33032831	G	0.2697	0.3997	A	23.77	1.088e-06	0.5547	0.1215	0.4372	0.7038	Imputed
6	rs34937821:33026553:G:A	33026553	G	0.2697	0.3997	A	23.77	1.088e-06	0.5547	0.1215	0.4372	0.7038	Imputed
6	rs35188681:33033146:T:C	33033146	T	0.2697	0.3997	C	23.77	1.088e-06	0.5547	0.1215	0.4372	0.7038	Imputed
6	rs35887191:33033541:CA:C	33033541	CA	0.2697	0.3997	C	23.77	1.088e-06	0.5547	0.1215	0.4372	0.7038	Imputed
6	rs67640541:33033484:C:T	33033484	C	0.2697	0.3997	T	23.77	1.088e-06	0.5547	0.1215	0.4372	0.7038	Imputed
6	rs72197234:33029359:TAA:T	33029359	TAA	0.2697	0.3997	T	23.77	1.088e-06	0.5547	0.1215	0.4372	0.7038	Imputed
6	rs72500559:33033494:C:G	33033494	C	0.2697	0.3997	G	23.77	1.088e-06	0.5547	0.1215	0.4372	0.7038	Imputed
6	rs72867692:33033520:T:A	33033520	T	0.2697	0.3997	A	23.77	1.088e-06	0.5547	0.1215	0.4372	0.7038	Imputed
6	rs72873939:33030875:A:G	33030875	A	0.2697	0.3997	G	23.77	1.088e-06	0.5547	0.1215	0.4372	0.7038	Imputed
6	rs72873941:33030883:C:T	33030883	C	0.2697	0.3997	T	23.77	1.088e-06	0.5547	0.1215	0.4372	0.7038	Imputed
6	rs73739618:33033507:C:T	33033507	C	0.2697	0.3997	T	23.77	1.088e-06	0.5547	0.1215	0.4372	0.7038	Imputed
6	rs9277568:33057055:T:C	33057055	T	0.2698	0.4007	C	23.73	1.109e-06	0.5528	0.1223	0.435	0.7025	Imputed
6	rs57896011:33038947:C:T	33038947	C	0.269	0.399	T	23.71	1.122e-06	0.5542	0.1218	0.4365	0.7036	Imputed
6	rs3091282:33057198:G:C	33057198	G	0.2666	0.3961	C	23.7	1.126e-06	0.5541	0.1219	0.4364	0.7036	Imputed
6	rs3130188:33057176:T:C	33057176	T	0.2666	0.3961	C	23.7	1.126e-06	0.5541	0.1219	0.4364	0.7036	Imputed
6	rs6911967	110328375	C	0.05975	0.1424	T	23.69	1.133e-06	0.3827	0.2031	0.2571	0.5698	Genotyped
3	rs67703040:146275728:C:T	146275728	T	0.1361	0.2443	C	23.68	1.136e-06	0.4873	0.1495	0.3636	0.6532	Imputed
6	rs9277553:33055516:T:C	33055516	T	0.2651	0.3945	C	23.62	1.172e-06	0.5537	0.1222	0.4357	0.7035	Imputed
6	rs72873925:33029160:G:C	33029160	G	0.4095	0.5471	C	23.62	1.173e-06	0.5742	0.1145	0.4587	0.7187	Imputed
6	rs114707319:33037412:G:C	33037412	G	0.2697	0.3994	C	23.62	1.175e-06	0.5555	0.1216	0.4377	0.7049	Imputed
6	rs116509985:33037413:C:A	33037413	C	0.2697	0.3994	A	23.62	1.175e-06	0.5555	0.1216	0.4377	0.7049	Imputed
6	rs72873935:33029776:G:C	33029776	G	0.2676	0.398	C	23.61	1.179e-06	0.5527	0.1226	0.4346	0.7028	Imputed
6	rs2295118:33060892:C:T	33060892	C	0.2673	0.3964	T	23.61	1.18e-06	0.5554	0.1216	0.4376	0.7049	Imputed
6	rs3117216:33063403:A:G	33063403	A	0.2673	0.3964	G	23.61	1.18e-06	0.5554	0.1216	0.4376	0.7049	Imputed
6	rs9277373:33050179:A:G	33050179	A	0.2739	0.4046	G	23.58	1.195e-06	0.5551	0.1218	0.4372	0.7047	Imputed
6	rs9277375:33050186:T:C	33050186	T	0.2739	0.4046	C	23.58	1.195e-06	0.5551	0.1218	0.4372	0.7047	Imputed
6	rs9277376:33050196:G:C	33050196	G	0.2739	0.4046	C	23.58	1.195e-06	0.5551	0.1218	0.4372	0.7047	Imputed
6	rs9277427:33051969:A:T	33051969	A	0.2801	0.4107	T	23.58	1.199e-06	0.5581	0.1206	0.4406	0.707	Imputed
3	rs75545521:146270749:G:A	146270749	A	0.09464	0.1906	G	23.58	1.2e-06	0.444	0.1702	0.3181	0.6198	Imputed
3	rs76714601:146270886:C:A	146270886	A	0.09464	0.1906	C	23.58	1.2e-06	0.444	0.1702	0.3181	0.6198	Imputed
6	rs112774344:33033655:C:A	33033655	C	0.27	0.401	A	23.57	1.203e-06	0.5524	0.1228	0.4342	0.7028	Imputed
6	rs1042872	33032905	T	0.2689	0.3981	C	23.57	1.205e-06	0.5561	0.1215	0.4383	0.7056	Genotyped
6	rs10717301:33026013:TC:T	33026013	TC	0.2689	0.3981	T	23.57	1.205e-06	0.5561	0.1215	0.4383	0.7056	Imputed
6	rs116724935:33026015:C:T	33026015	C	0.2689	0.3981	T	23.57	1.205e-06	0.5561	0.1215	0.4383	0.7056	Imputed
6	rs34984860:33025792:C:CA	33025792	C	0.2689	0.3981	CA	23.57	1.205e-06	0.5561	0.1215	0.4383	0.7056	Imputed
6	rs35953215	33031677	G	0.2689	0.3981	A	23.57	1.205e-06	0.5561	0.1215	0.4383	0.7056	Genotyped
6	rs4604307:33025671:C:G	33025671	C	0.2689	0.3981	G	23.57	1.205e-06	0.5561	0.1215	0.4383	0.7056	Imputed
6	rs7741912:33026087:C:G	33026087	C	0.2689	0.3981	G	23.57	1.205e-06	0.5561	0.1215	0.4383	0.7056	Imputed
6	rs7742205:33026084:G:A	33026084	G	0.2689	0.3981	A	23.57	1.205e-06	0.5561	0.1215	0.4383	0.7056	Imputed
6	rs9277411	33051683	C	0.2689	0.3981	T	23.57	1.205e-06	0.5561	0.1215	0.4383	0.7056	Genotyped
6	rs9277422:33051838:A:C	33051838	A	0.2689	0.3981	C	23.57	1.205e-06	0.5561	0.1215	0.4383	0.7056	Imputed
6	rs9277423:33051845:T:A	33051845	T	0.2689	0.3981	A	23.57	1.205e-06	0.5561	0.1215	0.4383	0.7056	Imputed
6	rs9277533	33054721	C	0.2689	0.3981	T	23.57	1.205e-06	0.5561	0.1215	0.4383	0.7056	Genotyped
6	rs9277538:33055047:A:G	33055047	A	0.2689	0.3981	G	23.57	1.205e-06	0.5561	0.1215	0.4383	0.7056	Imputed
6	rs72870103:33034956:G:A	33034956	G	0.273	0.4033	A	23.53	1.228e-06	0.5557	0.1217	0.4378	0.7054	Imputed
6	rs2308928:33036971:C:T	33036971	C	0.2704	0.3997	T	23.53	1.23e-06	0.5568	0.1213	0.439	0.7062	Imputed
6	rs2308929:33036959:G:A	33036959	G	0.2704	0.3997	A	23.53	1.23e-06	0.5568	0.1213	0.439	0.7062	Imputed
6	rs2308930:33036951:A:G	33036951	A	0.2704	0.3997	G	23.53	1.23e-06	0.5568	0.1213	0.439	0.7062	Imputed
6	rs34140193:33037082:A:G	33037082	A	0.2704	0.3997	G	23.53	1.23e-06	0.5568	0.1213	0.439	0.7062	Imputed
6	rs67510472:33031103:A:G	33031103	A	0.2704	0.3997	G	23.53	1.23e-06	0.5568	0.1213	0.439	0.7062	Imputed
6	rs73739671:33037080:G:A	33037080	G	0.2704	0.3997	A	23.53	1.23e-06	0.5568	0.1213	0.439	0.7062	Imputed
6	rs9277396	33051139	G	0.2704	0.3997	A	23.53	1.23e-06	0.5568	0.1213	0.439	0.7062	Genotyped
6	rs73738024:33029687:T:C	33029687	T	0.2698	0.3994	C	23.49	1.256e-06	0.5559	0.1218	0.4378	0.7057	Imputed
6	rs73738027:33029690:C:T	33029690	C	0.2698	0.3994	T	23.49	1.256e-06	0.5559	0.1218	0.4378	0.7057	Imputed
6	rs34013339:33034906:T:C	33034906	T	0.2724	0.403	C	23.49	1.258e-06	0.5548	0.1222	0.4367	0.7049	Imputed
6	rs34763441:33034900:A:G	33034900	A	0.2724	0.403	G	23.49	1.258e-06	0.5548	0.1222	0.4367	0.7049	Imputed
6	rs1126769:33036435:T:G	33036435	T	0.27	0.4	G	23.48	1.263e-06	0.5547	0.1222	0.4366	0.7048	Imputed
6	rs112045606:33031250:G:A	33031250	G	0.2697	0.399	A	23.47	1.269e-06	0.5563	0.1217	0.4383	0.706	Imputed
6	rs112315157:33031261:G:A	33031261	G	0.2697	0.399	A	23.47	1.269e-06	0.5563	0.1217	0.4383	0.706	Imputed
6	rs3128960	33050654	G	0.2736	0.4029	A	23.45	1.281e-06	0.5581	0.121	0.4403	0.7075	Genotyped
6	rs9277357	33049979	A	0.2736	0.4029	G	23.45	1.281e-06	0.5581	0.121	0.4403	0.7075	Genotyped
6	rs9277358:33049983:C:T	33049983	C	0.2736	0.4029	T	23.45	1.281e-06	0.5581	0.121	0.4403	0.7075	Imputed
6	rs9277362	33050078	A	0.2736	0.4029	G	23.45	1.281e-06	0.5581	0.121	0.4403	0.7075	Genotyped
6	rs9277363:33050079:C:G	33050079	C	0.2736	0.4029	G	23.45	1.281e-06	0.5581	0.121	0.4403	0.7075	Imputed
6	rs9277365:33050089:G:A	33050089	G	0.2736	0.4029	A	23.45	1.281e-06	0.5581	0.121	0.4403	0.7075	Imputed
6	rs9277371:33050158:T:C	33050158	T	0.2736	0.4029	C	23.45	1.281e-06	0.5581	0.121	0.4403	0.7075	Imputed
6	rs113229189:33040185:G:GACAAGGAACC	33040185	G	0.4119	0.5487	GACAAGGAACC	23.45	1.283e-06	0.5762	0.1142	0.4606	0.7207	Imputed
6	rs4345439:33040098:C:T	33040098	C	0.4119	0.5487	T	23.45	1.283e-06	0.5762	0.1142	0.4606	0.7207	Imputed
6	rs59423236:33029668:C:T	33029668	C	0.2714	0.401	T	23.45	1.284e-06	0.5566	0.1216	0.4385	0.7063	Imputed
6	rs112253815:33035349:A:ATATTCCTT	33035349	A	0.274	0.4046	ATATTCCTT	23.45	1.285e-06	0.5555	0.122	0.4373	0.7055	Imputed
6	rs9277372:33050168:C:A	33050168	C	0.2737	0.4036	A	23.45	1.285e-06	0.557	0.1214	0.439	0.7066	Imputed
6	rs77746323:33036401:C:T	33036401	C	0.2716	0.4016	T	23.44	1.29e-06	0.5554	0.1221	0.4372	0.7055	Imputed
6	rs1811359:33052382:G:C	33052382	G	0.2689	0.3977	C	23.42	1.303e-06	0.5569	0.1216	0.4388	0.7067	Imputed
6	rs1062481:33037611:C:T	33037611	C	0.4088	0.5453	T	23.41	1.306e-06	0.5766	0.1142	0.461	0.7212	Imputed
6	rs4640928	33040596	A	0.2752	0.4045	G	23.41	1.306e-06	0.5588	0.1208	0.441	0.7081	Genotyped
6	rs73739632:33034745:T:C	33034745	T	0.276	0.4082	C	23.41	1.31e-06	0.5527	0.1231	0.4342	0.7036	Imputed
6	rs73739633:33034746:T:A	33034746	T	0.276	0.4082	A	23.41	1.31e-06	0.5527	0.1231	0.4342	0.7036	Imputed
6	rs28452918:33039295:T:A	33039295	T	0.2792	0.4091	A	23.39	1.321e-06	0.5594	0.1206	0.4416	0.7087	Imputed
6	rs9380335:33025174:C:G	33025174	C	0.2653	0.3956	G	23.39	1.325e-06	0.5516	0.1237	0.4329	0.7028	Imputed
6	rs9277512:33054227:G:A	33054227	G	0.2864	0.4186	A	23.38	1.333e-06	0.5574	0.1214	0.4394	0.7072	Imputed
6	rs9277514:33054235:T:G	33054235	T	0.2864	0.4186	G	23.38	1.333e-06	0.5574	0.1214	0.4394	0.7072	Imputed
6	rs115660106:33033662:T:C	33033662	T	0.2707	0.401	C	23.34	1.36e-06	0.5544	0.1227	0.4359	0.7051	Imputed
6	rs1042331:33052950:T:C	33052950	T	0.2799	0.4094	C	23.31	1.381e-06	0.5607	0.1204	0.4428	0.7099	Imputed
6	rs9277495:33054071:G:C	33054071	G	0.2799	0.4094	C	23.31	1.381e-06	0.5607	0.1204	0.4428	0.7099	Imputed
6	rs3128963	33055780	C	0.2814	0.411	T	23.27	1.406e-06	0.5613	0.1202	0.4435	0.7105	Genotyped
6	rs35521473:33039606:C:T	33039606	C	0.2752	0.4042	T	23.27	1.406e-06	0.5595	0.1209	0.4414	0.7092	Imputed
6	rs9277437	33052250	A	0.2814	0.411	G	23.27	1.406e-06	0.5613	0.1202	0.4435	0.7105	Genotyped
6	rs2064476	33073322	A	0.2594	0.3867	G	23.26	1.416e-06	0.5555	0.1225	0.4369	0.7063	Genotyped
6	rs35683320:33034507:G:A	33034507	G	0.2706	0.3994	A	23.25	1.42e-06	0.5579	0.1216	0.4396	0.708	Imputed
6	rs66811558:33034518:G:A	33034518	G	0.2706	0.3994	A	23.25	1.42e-06	0.5579	0.1216	0.4396	0.708	Imputed
6	6:33064460:C:T	33064460	C	0.2681	0.3964	T	23.25	1.425e-06	0.5578	0.1217	0.4395	0.708	Imputed
6	rs9277452:33052717:A:C	33052717	A	0.2681	0.3964	C	23.25	1.425e-06	0.5578	0.1217	0.4395	0.708	Imputed
6	rs9277453:33052719:G:A	33052719	G	0.2681	0.3964	A	23.25	1.425e-06	0.5578	0.1217	0.4395	0.708	Imputed
6	rs9277454:33052723:C:G	33052723	C	0.2681	0.3964	G	23.25	1.425e-06	0.5578	0.1217	0.4395	0.708	Imputed
6	rs9277366:33050107:G:A	33050107	G	0.2744	0.4036	A	23.22	1.448e-06	0.559	0.1213	0.4407	0.709	Imputed
6	rs9277367:33050118:C:T	33050118	C	0.2744	0.4036	T	23.22	1.448e-06	0.559	0.1213	0.4407	0.709	Imputed
6	rs9277368:33050125:G:A	33050125	G	0.2744	0.4036	A	23.22	1.448e-06	0.559	0.1213	0.4407	0.709	Imputed
6	rs9277370:33050148:T:C	33050148	T	0.2744	0.4036	C	23.22	1.448e-06	0.559	0.1213	0.4407	0.709	Imputed
6	6:33031506:G:GT	33031506	G	0.2722	0.401	GT	23.21	1.45e-06	0.5586	0.1214	0.4403	0.7087	Imputed
6	rs34624643	33039376	C	0.2862	0.4159	T	23.17	1.481e-06	0.5631	0.1198	0.4452	0.7122	Genotyped
6	6:33026721:T:<CN0>:0	33026721	T	0.2651	0.3934	<CN0>	23.16	1.491e-06	0.5561	0.1225	0.4373	0.707	Imputed
6	rs73415247:33029205:C:T	33029205	C	0.2692	0.3984	T	23.15	1.495e-06	0.5564	0.1224	0.4377	0.7073	Imputed
6	rs9277925:33127138:C:A	33127138	A	0.2516	0.3782	C	23.15	1.502e-06	0.5526	0.1239	0.4334	0.7045	Imputed
3	rs13069082:146270768:G:A	146270768	A	0.1361	0.2427	G	23.12	1.519e-06	0.4916	0.1494	0.3668	0.6588	Imputed
6	rs67476218:33033388:A:C	33033388	A	0.2689	0.3971	C	23.12	1.523e-06	0.5584	0.1218	0.4399	0.7089	Imputed
6	rs67786321:33033390:A:T	33033390	A	0.2689	0.3971	T	23.12	1.523e-06	0.5584	0.1218	0.4399	0.7089	Imputed
6	rs72500558:33033357:C:G	33033357	C	0.2689	0.3971	G	23.12	1.523e-06	0.5584	0.1218	0.4399	0.7089	Imputed
6	rs7751953:33033351:G:T	33033351	G	0.2689	0.3971	T	23.12	1.523e-06	0.5584	0.1218	0.4399	0.7089	Imputed
6	rs111956837:33038034:C:T	33038034	C	0.2706	0.399	T	23.11	1.533e-06	0.5587	0.1217	0.4401	0.7092	Imputed
6	rs73415265:33031315:T:C	33031315	T	0.2706	0.399	C	23.11	1.533e-06	0.5587	0.1217	0.4401	0.7092	Imputed
6	rs9469326:33031287:T:G	33031287	T	0.2706	0.399	G	23.11	1.533e-06	0.5587	0.1217	0.4401	0.7092	Imputed
6	rs34018094:33034484:C:T	33034484	C	0.2723	0.401	T	23.08	1.554e-06	0.559	0.1216	0.4404	0.7095	Imputed
6	rs34041463:33034478:G:T	33034478	G	0.2723	0.401	T	23.08	1.554e-06	0.559	0.1216	0.4404	0.7095	Imputed
6	rs34489465:33034471:A:G	33034471	A	0.2723	0.401	G	23.08	1.554e-06	0.559	0.1216	0.4404	0.7095	Imputed
6	rs73400009:33033639:G:A	33033639	G	0.27	0.399	A	23.03	1.592e-06	0.557	0.1225	0.4381	0.7082	Imputed
6	6:33051724:CA:C	33051724	CA	0.2689	0.3964	C	23.01	1.612e-06	0.5599	0.1215	0.4412	0.7104	Imputed
6	6:33051726:CAGAGGAGGA:C	33051726	CAGAGGAGGA	0.2689	0.3964	C	23.01	1.612e-06	0.5599	0.1215	0.4412	0.7104	Imputed
6	6:33051736:A:T	33051736	A	0.2689	0.3964	T	23.01	1.612e-06	0.5599	0.1215	0.4412	0.7104	Imputed
6	6:33051737:C:T	33051737	C	0.2689	0.3964	T	23.01	1.612e-06	0.5599	0.1215	0.4412	0.7104	Imputed
6	rs1042187:33052768:T:C	33052768	T	0.2689	0.3964	C	23.01	1.612e-06	0.5599	0.1215	0.4412	0.7104	Imputed
6	rs1042212:33052803:G:A	33052803	G	0.2689	0.3964	A	23.01	1.612e-06	0.5599	0.1215	0.4412	0.7104	Imputed
6	rs1042335:33052958:C:T	33052958	C	0.2689	0.3964	T	23.01	1.612e-06	0.5599	0.1215	0.4412	0.7104	Imputed
6	rs1071597:33052986:T:C	33052986	T	0.2689	0.3964	C	23.01	1.612e-06	0.5599	0.1215	0.4412	0.7104	Imputed
6	rs3117228	33056435	G	0.2689	0.3964	T	23.01	1.612e-06	0.5599	0.1215	0.4412	0.7104	Genotyped
6	rs3128964	33055818	A	0.2689	0.3964	G	23.01	1.612e-06	0.5599	0.1215	0.4412	0.7104	Genotyped
6	rs5875436:33055843:TTATC:T	33055843	TTATC	0.2689	0.3964	T	23.01	1.612e-06	0.5599	0.1215	0.4412	0.7104	Imputed
6	rs9277392:33050829:G:C	33050829	G	0.2689	0.3964	C	23.01	1.612e-06	0.5599	0.1215	0.4412	0.7104	Imputed
6	rs9277393	33050877	A	0.2689	0.3964	G	23.01	1.612e-06	0.5599	0.1215	0.4412	0.7104	Genotyped
6	rs9277394:33050970:A:T	33050970	A	0.2689	0.3964	T	23.01	1.612e-06	0.5599	0.1215	0.4412	0.7104	Imputed
6	rs9277395	33051051	A	0.2689	0.3964	G	23.01	1.612e-06	0.5599	0.1215	0.4412	0.7104	Genotyped
6	rs9277397:33051277:A:G	33051277	A	0.2689	0.3964	G	23.01	1.612e-06	0.5599	0.1215	0.4412	0.7104	Imputed
6	rs9277399:33051307:A:G	33051307	A	0.2689	0.3964	G	23.01	1.612e-06	0.5599	0.1215	0.4412	0.7104	Imputed
6	rs9277400:33051316:G:A	33051316	G	0.2689	0.3964	A	23.01	1.612e-06	0.5599	0.1215	0.4412	0.7104	Imputed
6	rs9277404:33051493:T:C	33051493	T	0.2689	0.3964	C	23.01	1.612e-06	0.5599	0.1215	0.4412	0.7104	Imputed
6	rs9277405:33051500:A:G	33051500	A	0.2689	0.3964	G	23.01	1.612e-06	0.5599	0.1215	0.4412	0.7104	Imputed
6	rs9277409:33051624:C:G	33051624	C	0.2689	0.3964	G	23.01	1.612e-06	0.5599	0.1215	0.4412	0.7104	Imputed
6	rs9277410	33051640	G	0.2689	0.3964	A	23.01	1.612e-06	0.5599	0.1215	0.4412	0.7104	Genotyped
6	rs9277413	33051720	G	0.2689	0.3964	A	23.01	1.612e-06	0.5599	0.1215	0.4412	0.7104	Genotyped
6	rs9277414:33051723:G:T	33051723	G	0.2689	0.3964	T	23.01	1.612e-06	0.5599	0.1215	0.4412	0.7104	Imputed
6	rs9277417:33051741:A:G	33051741	A	0.2689	0.3964	G	23.01	1.612e-06	0.5599	0.1215	0.4412	0.7104	Imputed
6	rs9277419:33051777:A:G	33051777	A	0.2689	0.3964	G	23.01	1.612e-06	0.5599	0.1215	0.4412	0.7104	Imputed
6	rs9277420:33051790:C:A	33051790	C	0.2689	0.3964	A	23.01	1.612e-06	0.5599	0.1215	0.4412	0.7104	Imputed
6	rs9277429	33052007	G	0.2689	0.3964	A	23.01	1.612e-06	0.5599	0.1215	0.4412	0.7104	Genotyped
6	rs9277430:33052008:T:C	33052008	T	0.2689	0.3964	C	23.01	1.612e-06	0.5599	0.1215	0.4412	0.7104	Imputed
6	rs9277431:33052028:C:T	33052028	C	0.2689	0.3964	T	23.01	1.612e-06	0.5599	0.1215	0.4412	0.7104	Imputed
6	rs9277432:33052072:A:T	33052072	A	0.2689	0.3964	T	23.01	1.612e-06	0.5599	0.1215	0.4412	0.7104	Imputed
6	rs9277433:33052128:C:T	33052128	C	0.2689	0.3964	T	23.01	1.612e-06	0.5599	0.1215	0.4412	0.7104	Imputed
6	rs9277434	33052186	A	0.2689	0.3964	G	23.01	1.612e-06	0.5599	0.1215	0.4412	0.7104	Genotyped
6	rs9277438:33052303:C:T	33052303	C	0.2689	0.3964	T	23.01	1.612e-06	0.5599	0.1215	0.4412	0.7104	Imputed
6	rs9277439:33052315:C:A	33052315	C	0.2689	0.3964	A	23.01	1.612e-06	0.5599	0.1215	0.4412	0.7104	Imputed
6	rs9277440:33052327:C:T	33052327	C	0.2689	0.3964	T	23.01	1.612e-06	0.5599	0.1215	0.4412	0.7104	Imputed
6	rs9277443:33052414:A:G	33052414	A	0.2689	0.3964	G	23.01	1.612e-06	0.5599	0.1215	0.4412	0.7104	Imputed
6	rs9277444:33052439:A:G	33052439	A	0.2689	0.3964	G	23.01	1.612e-06	0.5599	0.1215	0.4412	0.7104	Imputed
6	rs9277447:33052562:T:C	33052562	T	0.2689	0.3964	C	23.01	1.612e-06	0.5599	0.1215	0.4412	0.7104	Imputed
6	rs9277448:33052572:T:C	33052572	T	0.2689	0.3964	C	23.01	1.612e-06	0.5599	0.1215	0.4412	0.7104	Imputed
6	rs9277449:33052615:T:C	33052615	T	0.2689	0.3964	C	23.01	1.612e-06	0.5599	0.1215	0.4412	0.7104	Imputed
6	rs9277458	33053167	A	0.2689	0.3964	C	23.01	1.612e-06	0.5599	0.1215	0.4412	0.7104	Genotyped
6	rs9277459:33053248:A:G	33053248	A	0.2689	0.3964	G	23.01	1.612e-06	0.5599	0.1215	0.4412	0.7104	Imputed
6	rs9277460:33053252:G:A	33053252	G	0.2689	0.3964	A	23.01	1.612e-06	0.5599	0.1215	0.4412	0.7104	Imputed
6	rs9277463	33053307	C	0.2689	0.3964	T	23.01	1.612e-06	0.5599	0.1215	0.4412	0.7104	Genotyped
6	rs9277466	33053399	T	0.2689	0.3964	C	23.01	1.612e-06	0.5599	0.1215	0.4412	0.7104	Genotyped
6	rs9277467:33053444:G:C	33053444	G	0.2689	0.3964	C	23.01	1.612e-06	0.5599	0.1215	0.4412	0.7104	Imputed
6	rs9277468:33053455:C:T	33053455	C	0.2689	0.3964	T	23.01	1.612e-06	0.5599	0.1215	0.4412	0.7104	Imputed
6	rs9277469:33053468:G:T	33053468	G	0.2689	0.3964	T	23.01	1.612e-06	0.5599	0.1215	0.4412	0.7104	Imputed
6	rs9277470:33053477:G:C	33053477	G	0.2689	0.3964	C	23.01	1.612e-06	0.5599	0.1215	0.4412	0.7104	Imputed
6	rs9277472:33053723:T:C	33053723	T	0.2689	0.3964	C	23.01	1.612e-06	0.5599	0.1215	0.4412	0.7104	Imputed
6	rs9277473:33053728:C:T	33053728	C	0.2689	0.3964	T	23.01	1.612e-06	0.5599	0.1215	0.4412	0.7104	Imputed
6	rs9277474:33053737:G:T	33053737	G	0.2689	0.3964	T	23.01	1.612e-06	0.5599	0.1215	0.4412	0.7104	Imputed
6	rs9277476:33053740:T:A	33053740	T	0.2689	0.3964	A	23.01	1.612e-06	0.5599	0.1215	0.4412	0.7104	Imputed
6	rs9277477:33053772:G:A	33053772	G	0.2689	0.3964	A	23.01	1.612e-06	0.5599	0.1215	0.4412	0.7104	Imputed
6	rs9277478:33053780:T:A	33053780	T	0.2689	0.3964	A	23.01	1.612e-06	0.5599	0.1215	0.4412	0.7104	Imputed
6	rs9277479:33053789:A:G	33053789	A	0.2689	0.3964	G	23.01	1.612e-06	0.5599	0.1215	0.4412	0.7104	Imputed
6	rs9277485:33053887:A:G	33053887	A	0.2689	0.3964	G	23.01	1.612e-06	0.5599	0.1215	0.4412	0.7104	Imputed
6	rs9277486:33053890:G:A	33053890	G	0.2689	0.3964	A	23.01	1.612e-06	0.5599	0.1215	0.4412	0.7104	Imputed
6	rs9277487:33053902:A:G	33053902	A	0.2689	0.3964	G	23.01	1.612e-06	0.5599	0.1215	0.4412	0.7104	Imputed
6	rs9277488:33053906:G:T	33053906	G	0.2689	0.3964	T	23.01	1.612e-06	0.5599	0.1215	0.4412	0.7104	Imputed
6	rs9277490:33053968:T:A	33053968	T	0.2689	0.3964	A	23.01	1.612e-06	0.5599	0.1215	0.4412	0.7104	Imputed
6	rs9277491:33053971:T:C	33053971	T	0.2689	0.3964	C	23.01	1.612e-06	0.5599	0.1215	0.4412	0.7104	Imputed
6	rs9277492:33053982:G:C	33053982	G	0.2689	0.3964	C	23.01	1.612e-06	0.5599	0.1215	0.4412	0.7104	Imputed
6	rs9277493:33054046:T:G	33054046	T	0.2689	0.3964	G	23.01	1.612e-06	0.5599	0.1215	0.4412	0.7104	Imputed
6	rs9277494:33054057:G:A	33054057	G	0.2689	0.3964	A	23.01	1.612e-06	0.5599	0.1215	0.4412	0.7104	Imputed
6	rs9277497:33054091:C:T	33054091	C	0.2689	0.3964	T	23.01	1.612e-06	0.5599	0.1215	0.4412	0.7104	Imputed
6	rs9277508	33054177	T	0.2689	0.3964	C	23.01	1.612e-06	0.5599	0.1215	0.4412	0.7104	Genotyped
6	rs9277537	33055009	C	0.2689	0.3964	A	23.01	1.612e-06	0.5599	0.1215	0.4412	0.7104	Genotyped
6	rs9277540:33055123:A:G	33055123	A	0.2689	0.3964	G	23.01	1.612e-06	0.5599	0.1215	0.4412	0.7104	Imputed
6	rs9277541:33055158:A:G	33055158	A	0.2689	0.3964	G	23.01	1.612e-06	0.5599	0.1215	0.4412	0.7104	Imputed
6	rs9277542	33055247	T	0.2689	0.3964	C	23.01	1.612e-06	0.5599	0.1215	0.4412	0.7104	Genotyped
6	rs9277543:33055294:G:A	33055294	G	0.2689	0.3964	A	23.01	1.612e-06	0.5599	0.1215	0.4412	0.7104	Imputed
6	rs9277544:33055308:C:T	33055308	C	0.2689	0.3964	T	23.01	1.612e-06	0.5599	0.1215	0.4412	0.7104	Imputed
6	rs9277546	33055346	T	0.2689	0.3964	G	23.01	1.612e-06	0.5599	0.1215	0.4412	0.7104	Genotyped
6	rs9277547:33055367:C:A	33055367	C	0.2689	0.3964	A	23.01	1.612e-06	0.5599	0.1215	0.4412	0.7104	Imputed
6	rs9277548:33055390:C:T	33055390	C	0.2689	0.3964	T	23.01	1.612e-06	0.5599	0.1215	0.4412	0.7104	Imputed
6	rs9277549	33055419	A	0.2689	0.3964	G	23.01	1.612e-06	0.5599	0.1215	0.4412	0.7104	Genotyped
6	rs9277550:33055487:T:C	33055487	T	0.2689	0.3964	C	23.01	1.612e-06	0.5599	0.1215	0.4412	0.7104	Imputed
6	rs9277551:33055494:G:T	33055494	G	0.2689	0.3964	T	23.01	1.612e-06	0.5599	0.1215	0.4412	0.7104	Imputed
6	rs9277554:33055538:C:T	33055538	C	0.2689	0.3964	T	23.01	1.612e-06	0.5599	0.1215	0.4412	0.7104	Imputed
6	rs9277566:33056916:G:T	33056916	G	0.2689	0.3964	T	23.01	1.612e-06	0.5599	0.1215	0.4412	0.7104	Imputed
6	rs9282411:33051827:T:TA	33051827	T	0.2689	0.3964	TA	23.01	1.612e-06	0.5599	0.1215	0.4412	0.7104	Imputed
6	rs928:33054552:C:G	33054552	C	0.2689	0.3964	G	23.01	1.612e-06	0.5599	0.1215	0.4412	0.7104	Imputed
6	AX-11677589	33051910	C	0.2704	0.3981	A	22.97	1.644e-06	0.5606	0.1213	0.4419	0.711	Genotyped
6	rs2395309	33026246	A	0.2704	0.3981	G	22.97	1.644e-06	0.5606	0.1213	0.4419	0.711	Genotyped
6	rs9277424	33051865	A	0.2704	0.3981	C	22.97	1.644e-06	0.5606	0.1213	0.4419	0.711	Genotyped
6	rs111310925:33033690:C:A	33033690	C	0.2732	0.4027	A	22.95	1.666e-06	0.5575	0.1226	0.4384	0.7088	Imputed
6	rs113405752:33033681:T:C	33033681	T	0.2732	0.4027	C	22.95	1.666e-06	0.5575	0.1226	0.4384	0.7088	Imputed
6	rs113781863:33033685:A:G	33033685	A	0.2732	0.4027	G	22.95	1.666e-06	0.5575	0.1226	0.4384	0.7088	Imputed
6	rs9277926:33128282:C:T	33128282	T	0.2508	0.3766	C	22.93	1.677e-06	0.5541	0.1239	0.4346	0.7064	Imputed
6	rs3097672:33050442:C:A	33050442	C	0.2736	0.4013	A	22.9	1.71e-06	0.5619	0.121	0.4432	0.7123	Imputed
6	rs3097673:33050671:A:C	33050671	A	0.2736	0.4013	C	22.9	1.71e-06	0.5619	0.121	0.4432	0.7123	Imputed
6	rs3128961	33050742	G	0.2736	0.4013	A	22.9	1.71e-06	0.5619	0.121	0.4432	0.7123	Genotyped
6	rs9277385:33050473:A:G	33050473	A	0.2736	0.4013	G	22.9	1.71e-06	0.5619	0.121	0.4432	0.7123	Imputed
6	rs9277388:33050525:T:C	33050525	T	0.2736	0.4013	C	22.9	1.71e-06	0.5619	0.121	0.4432	0.7123	Imputed
6	rs9277389:33050526:C:T	33050526	C	0.2736	0.4013	T	22.9	1.71e-06	0.5619	0.121	0.4432	0.7123	Imputed
6	rs4551215:33025700:C:T	33025700	C	0.4104	0.5453	T	22.87	1.729e-06	0.5803	0.1141	0.464	0.7258	Imputed
6	rs5025822:33025787:G:C	33025787	G	0.4104	0.5453	C	22.87	1.729e-06	0.5803	0.1141	0.464	0.7258	Imputed
6	rs73415231:33025884:G:A	33025884	G	0.4104	0.5453	A	22.87	1.729e-06	0.5803	0.1141	0.464	0.7258	Imputed
6	rs72879614:33037891:C:T	33037891	C	0.2717	0.4007	T	22.87	1.736e-06	0.5581	0.1226	0.4389	0.7096	Imputed
6	rs73739675:33037866:A:G	33037866	A	0.2717	0.4007	G	22.87	1.736e-06	0.5581	0.1226	0.4389	0.7096	Imputed
6	rs9277406:33051554:T:C	33051554	T	0.2689	0.3961	C	22.86	1.742e-06	0.5607	0.1216	0.4418	0.7115	Imputed
6	rs9277407:33051558:T:C	33051558	T	0.2689	0.3961	C	22.86	1.742e-06	0.5607	0.1216	0.4418	0.7115	Imputed
6	rs3097650	33057440	C	0.2752	0.4029	T	22.86	1.743e-06	0.5626	0.1209	0.4439	0.7129	Genotyped
6	rs72500560:33039927:T:C	33039927	T	0.2752	0.4029	C	22.86	1.743e-06	0.5626	0.1209	0.4439	0.7129	Imputed
6	rs72500562:33039980:A:G	33039980	A	0.2752	0.4029	G	22.86	1.743e-06	0.5626	0.1209	0.4439	0.7129	Imputed
6	rs9277382	33050441	G	0.2752	0.4029	A	22.86	1.743e-06	0.5626	0.1209	0.4439	0.7129	Genotyped
6	rs151124723:33033668:G:GCTT	33033668	G	0.2732	0.4024	GCTT	22.8	1.798e-06	0.5582	0.1227	0.4389	0.71	Imputed
6	rs13196639	33039484	A	0.2799	0.4078	G	22.75	1.842e-06	0.5645	0.1204	0.4458	0.7147	Genotyped
6	rs9380337	33040781	A	0.2799	0.4078	G	22.75	1.842e-06	0.5645	0.1204	0.4458	0.7147	Genotyped
6	rs9277380:33050369:C:G	33050369	C	0.2736	0.401	G	22.75	1.843e-06	0.5626	0.1211	0.4438	0.7134	Imputed
6	rs67022713:33029276:T:C	33029276	T	0.2692	0.3971	C	22.75	1.849e-06	0.5595	0.1224	0.4402	0.7111	Imputed
6	rs72873927:33029255:G:T	33029255	G	0.2692	0.3971	T	22.75	1.849e-06	0.5595	0.1224	0.4402	0.7111	Imputed
6	rs72873929:33029326:T:A	33029326	T	0.2692	0.3971	A	22.75	1.849e-06	0.5595	0.1224	0.4402	0.7111	Imputed
6	rs74377428:33029223:C:T	33029223	C	0.2692	0.3971	T	22.75	1.849e-06	0.5595	0.1224	0.4402	0.7111	Imputed
6	rs200239692:33033177:G:A	33033177	G	0.273	0.4007	A	22.7	1.889e-06	0.5618	0.1216	0.4427	0.7129	Imputed
6	rs201212911:33033178:G:A	33033178	G	0.273	0.4007	A	22.7	1.889e-06	0.5618	0.1216	0.4427	0.7129	Imputed
6	rs34320499:33033202:C:T	33033202	C	0.273	0.4007	T	22.7	1.889e-06	0.5618	0.1216	0.4427	0.7129	Imputed
6	rs36030612:33033170:T:C	33033170	T	0.273	0.4007	C	22.7	1.889e-06	0.5618	0.1216	0.4427	0.7129	Imputed
6	rs73739611:33033188:C:T	33033188	C	0.273	0.4007	T	22.7	1.889e-06	0.5618	0.1216	0.4427	0.7129	Imputed
6	rs6457711:33045272:C:A	33045272	C	0.2435	0.3703	A	22.7	1.893e-06	0.5472	0.1272	0.4264	0.7022	Imputed
6	rs9277428:33051976:T:A	33051976	T	0.2706	0.3977	A	22.7	1.896e-06	0.5617	0.1216	0.4426	0.7129	Imputed
6	rs34083733:33039446:G:A	33039446	G	0.283	0.411	A	22.69	1.908e-06	0.5657	0.1201	0.447	0.7159	Imputed
6	rs34507584:33039767:A:G	33039767	A	0.2746	0.4023	G	22.67	1.927e-06	0.5625	0.1214	0.4434	0.7136	Imputed
6	rs10536191:33052167:GTCTATT:G	33052167	GTCTATT	0.2697	0.3964	G	22.65	1.942e-06	0.5623	0.1215	0.4431	0.7135	Imputed
6	rs9277435:33052220:T:A	33052220	T	0.2697	0.3964	A	22.65	1.942e-06	0.5623	0.1215	0.4431	0.7135	Imputed
6	rs9277436:33052221:C:T	33052221	C	0.2697	0.3964	T	22.65	1.942e-06	0.5623	0.1215	0.4431	0.7135	Imputed
6	rs9277563:33056763:A:G	33056763	A	0.2697	0.3964	G	22.65	1.942e-06	0.5623	0.1215	0.4431	0.7135	Imputed
6	rs9277564:33056765:C:T	33056765	C	0.2697	0.3964	T	22.65	1.942e-06	0.5623	0.1215	0.4431	0.7135	Imputed
6	rs9277461:33053270:T:A	33053270	T	0.2706	0.3974	A	22.55	2.047e-06	0.5625	0.1217	0.4431	0.714	Imputed
6	rs9277462:33053271:T:C	33053271	T	0.2706	0.3974	C	22.55	2.047e-06	0.5625	0.1217	0.4431	0.714	Imputed
6	rs1431400:33041176:C:T	33041176	C	0.2744	0.4013	T	22.53	2.064e-06	0.5643	0.1211	0.4451	0.7155	Imputed
6	rs9277482:33053868:A:G	33053868	A	0.2697	0.3961	G	22.5	2.097e-06	0.5631	0.1216	0.4436	0.7147	Imputed
6	rs9277483:33053871:A:G	33053871	A	0.2697	0.3961	G	22.5	2.097e-06	0.5631	0.1216	0.4436	0.7147	Imputed
6	rs3830066:33037187:C:G	33037187	C	0.2673	0.3932	G	22.5	2.106e-06	0.563	0.1217	0.4435	0.7146	Imputed
6	rs200005596:33038834:A:G	33038834	A	0.2701	0.398	G	22.46	2.145e-06	0.5597	0.123	0.4398	0.7124	Imputed
6	rs201911418:33038833:G:A	33038833	G	0.2701	0.398	A	22.46	2.145e-06	0.5597	0.123	0.4398	0.7124	Imputed
6	rs9277408	33051562	G	0.2689	0.3948	A	22.46	2.149e-06	0.5637	0.1215	0.4442	0.7153	Genotyped
6	rs9277471	33053682	G	0.2689	0.3948	A	22.46	2.149e-06	0.5637	0.1215	0.4442	0.7153	Genotyped
6	rs9277850:33104857:C:T	33104857	C	0.226	0.3483	T	22.43	2.175e-06	0.5461	0.1285	0.4246	0.7025	Imputed
6	rs3117225	33057711	G	0.2704	0.3964	A	22.42	2.192e-06	0.5644	0.1214	0.4449	0.7159	Genotyped
6	rs9277412	33051689	C	0.2704	0.3964	T	22.42	2.192e-06	0.5644	0.1214	0.4449	0.7159	Genotyped
6	rs9277534	33054807	A	0.2704	0.3964	G	22.42	2.192e-06	0.5644	0.1214	0.4449	0.7159	Genotyped
6	rs9277536	33054890	C	0.2704	0.3964	T	22.42	2.192e-06	0.5644	0.1214	0.4449	0.7159	Genotyped
6	rs9348904:33040835:A:G	33040835	A	0.2744	0.401	G	22.39	2.222e-06	0.5651	0.1212	0.4456	0.7166	Imputed
6	rs1042544	33054457	A	0.272	0.3981	G	22.38	2.235e-06	0.565	0.1212	0.4455	0.7166	Genotyped
6	rs3097652	33057835	C	0.272	0.3981	T	22.38	2.235e-06	0.565	0.1212	0.4455	0.7166	Genotyped
6	rs6914995:33040744:G:C	33040744	G	0.276	0.4026	C	22.36	2.264e-06	0.5657	0.121	0.4463	0.7172	Imputed
6	rs9277401:33051394:C:T	33051394	C	0.2697	0.3958	T	22.36	2.265e-06	0.5639	0.1217	0.4442	0.7158	Imputed
6	rs9277402:33051460:C:T	33051460	C	0.2697	0.3958	T	22.36	2.265e-06	0.5639	0.1217	0.4442	0.7158	Imputed
6	rs9277403:33051467:A:G	33051467	A	0.2697	0.3958	G	22.36	2.265e-06	0.5639	0.1217	0.4442	0.7158	Imputed
6	rs9277387	33050521	G	0.2736	0.3997	T	22.35	2.278e-06	0.5657	0.1211	0.4462	0.7172	Genotyped
6	rs112051508:33031406:A:G	33031406	A	0.274	0.4017	G	22.31	2.316e-06	0.5623	0.1224	0.4423	0.7148	Imputed
6	rs113281050:33031417:A:T	33031417	A	0.274	0.4017	T	22.31	2.316e-06	0.5623	0.1224	0.4423	0.7148	Imputed
6	rs9277532:33054711:G:T	33054711	G	0.2689	0.3945	T	22.31	2.322e-06	0.5645	0.1216	0.4447	0.7164	Imputed
6	rs928976	33049211	C	0.2547	0.3786	T	22.28	2.359e-06	0.5609	0.1231	0.4406	0.7139	Genotyped
6	rs9380338:33040798:T:C	33040798	T	0.2767	0.4029	C	22.27	2.364e-06	0.567	0.1208	0.4475	0.7184	Imputed
6	rs35877170:33034702:C:G	33034702	C	0.279	0.4074	G	22.22	2.43e-06	0.5629	0.1224	0.4428	0.7156	Imputed
6	rs36050357:33034699:A:T	33034699	A	0.279	0.4074	T	22.22	2.43e-06	0.5629	0.1224	0.4428	0.7156	Imputed
6	rs34197320	33039503	C	0.2799	0.4061	T	22.21	2.449e-06	0.5683	0.1205	0.4488	0.7196	Genotyped
6	rs9277507:33054176:T:A	33054176	T	0.2736	0.3994	A	22.2	2.454e-06	0.5665	0.1212	0.4467	0.7183	Imputed
6	rs929:33054619:G:A	33054619	G	0.2726	0.3997	A	22.07	2.63e-06	0.5629	0.1229	0.4424	0.7162	Imputed
6	rs3097674:33050683:A:G	33050683	A	0.2736	0.399	G	22.06	2.645e-06	0.5672	0.1213	0.4473	0.7194	Imputed
6	rs935:33054579:C:T	33054579	C	0.2717	0.398	T	22.05	2.655e-06	0.5642	0.1224	0.4439	0.7172	Imputed
6	rs9469331:33034785:G:A	33034785	G	0.2753	0.401	A	22.03	2.678e-06	0.5676	0.1212	0.4476	0.7197	Imputed
6	rs149411024:32601995:G:A	32601995	A	0.1924	0.09836	G	22.03	2.69e-06	2.184	0.1692	1.568	3.043	Imputed
6	rs2856822:33047432:A:C	33047432	A	0.1955	0.3115	C	21.96	2.788e-06	0.5372	0.1335	0.4135	0.6979	Imputed
6	rs57441145:33025107:A:AC	33025107	A	0.267	0.3936	AC	21.95	2.797e-06	0.5612	0.1239	0.4402	0.7154	Imputed
6	rs6914849:33040715:G:A	33040715	G	0.2864	0.4131	A	21.95	2.798e-06	0.5701	0.1204	0.4503	0.7219	Imputed
6	rs9277758	33095162	G	0.1903	0.3042	A	21.92	2.844e-06	0.5374	0.1336	0.4136	0.6983	Genotyped
6	rs9277441	33052354	C	0.2689	0.3932	A	21.91	2.856e-06	0.5675	0.1216	0.4472	0.7202	Genotyped
6	rs931	33054550	G	0.2689	0.3932	A	21.91	2.856e-06	0.5675	0.1216	0.4472	0.7202	Genotyped
6	rs35039691:33039405:C:G	33039405	C	0.2971	0.4248	G	21.9	2.872e-06	0.5723	0.1197	0.4526	0.7237	Imputed
6	rs3116963:33120847:C:T	33120847	C	0.217	0.335	T	21.87	2.913e-06	0.5502	0.1285	0.4277	0.7078	Imputed
6	rs35030344:33034653:C:A	33034653	C	0.2722	0.3971	A	21.82	2.994e-06	0.5678	0.1217	0.4473	0.7208	Imputed
6	rs79859457:33052677:A:G	33052677	A	0.2689	0.3929	G	21.76	3.087e-06	0.5683	0.1217	0.4477	0.7214	Imputed
6	rs3179778:33035974:A:G	33035974	A	0.2667	0.3911	G	21.71	3.179e-06	0.5662	0.1227	0.4452	0.72	Imputed
6	rs3180556:33035982:G:A	33035982	G	0.2667	0.3911	A	21.71	3.179e-06	0.5662	0.1227	0.4452	0.72	Imputed
6	rs3180557:33035980:T:A	33035980	T	0.2667	0.3911	A	21.71	3.179e-06	0.5662	0.1227	0.4452	0.72	Imputed
6	rs9378177	33049384	G	0.4277	0.301	A	21.7	3.182e-06	1.736	0.1188	1.375	2.191	Genotyped
6	rs932:33054586:A:G	33054586	A	0.2726	0.3983	G	21.66	3.25e-06	0.566	0.1228	0.4449	0.7201	Imputed
6	rs933:33054595:C:T	33054595	C	0.2726	0.3983	T	21.66	3.25e-06	0.566	0.1228	0.4449	0.7201	Imputed
6	rs60461436:33029639:C:A	33029639	C	0.2742	0.3997	A	21.65	3.267e-06	0.5674	0.1223	0.4465	0.7212	Imputed
6	6:32559933:A:C	32559933	C	0.1943	0.1006	A	21.63	3.315e-06	2.154	0.1677	1.551	2.992	Imputed
6	rs9277727:33091661:T:C	33091661	C	0.1911	0.3049	T	21.55	3.449e-06	0.5385	0.1343	0.4139	0.7006	Imputed
6	rs3129254:33108287:A:G	33108287	A	0.2334	0.3528	G	21.53	3.475e-06	0.5588	0.1261	0.4364	0.7154	Imputed
6	rs9277882:33108270:T:G	33108270	T	0.2334	0.3528	G	21.53	3.475e-06	0.5588	0.1261	0.4364	0.7154	Imputed
3	rs74968588:146278622:G:A	146278622	A	0.09335	0.1844	G	21.51	3.522e-06	0.4555	0.1725	0.3248	0.6386	Imputed
6	rs67106216:33034530:A:G	33034530	A	0.2753	0.3994	G	21.49	3.55e-06	0.5714	0.1212	0.4506	0.7247	Imputed
6	rs2071366:33032627:A:G	33032627	A	0.2657	0.3883	G	21.45	3.641e-06	0.57	0.1219	0.4488	0.7239	Imputed
6	rs75314265:32560132:T:C	32560132	C	0.1943	0.101	T	21.41	3.708e-06	2.147	0.1677	1.545	2.982	Imputed
6	rs9277359	33050024	C	0.2673	0.39	A	21.41	3.713e-06	0.5707	0.1218	0.4495	0.7245	Genotyped
6	6:33104795:A:G	33104795	A	0.2373	0.3576	G	21.39	3.746e-06	0.5588	0.1265	0.4361	0.716	Imputed
6	rs5875438:33115201:TA:T	33115201	TA	0.2333	0.3523	T	21.31	3.913e-06	0.5596	0.1264	0.4368	0.717	Imputed
6	rs67047708:33028830:C:T	33028830	C	0.2749	0.3993	T	21.29	3.952e-06	0.5703	0.1222	0.4488	0.7247	Imputed
6	rs35769133:33039848:G:A	33039848	G	0.2792	0.4026	A	21.21	4.121e-06	0.5747	0.1208	0.4536	0.7282	Imputed
6	rs72879690:33039855:A:G	33039855	A	0.2792	0.4026	G	21.21	4.121e-06	0.5747	0.1208	0.4536	0.7282	Imputed
6	rs4711316:33090290:A:G	33090290	G	0.3194	0.4472	A	21.2	4.129e-06	0.58	0.1187	0.4596	0.732	Imputed
6	rs4713606:33090289:A:T	33090289	T	0.3194	0.4472	A	21.2	4.129e-06	0.58	0.1187	0.4596	0.732	Imputed
6	rs766932:33082729:A:T	33082729	T	0.2003	0.3139	A	21.18	4.175e-06	0.5475	0.1318	0.4229	0.7088	Imputed
6	rs143489364:33094423:C:CTAACCCCCA	33094423	CTAACCCCCA	0.1893	0.301	C	21.14	4.265e-06	0.5422	0.1341	0.4169	0.7052	Imputed
6	rs9280357:33127361:TA:T	33127361	T	0.2866	0.4107	TA	21.1	4.354e-06	0.5765	0.1204	0.4553	0.7299	Imputed
6	rs9277723:33091454:G:A	33091454	A	0.1903	0.3019	G	21.09	4.374e-06	0.5432	0.1338	0.4179	0.7061	Imputed
6	rs9277724:33091471:C:T	33091471	T	0.1903	0.3019	C	21.09	4.374e-06	0.5432	0.1338	0.4179	0.7061	Imputed
6	rs9277725:33091543:A:T	33091543	T	0.1903	0.3019	A	21.09	4.374e-06	0.5432	0.1338	0.4179	0.7061	Imputed
6	rs9277728:33091810:C:G	33091810	G	0.1903	0.3019	C	21.09	4.374e-06	0.5432	0.1338	0.4179	0.7061	Imputed
6	rs4582419	33040138	A	0.5503	0.4207	G	21.07	4.418e-06	1.685	0.114	1.348	2.107	Genotyped
6	rs11269757:33038897:GGACCCAGTCTGTGCTTGGCCACTTACAGT:G	33038897	GGACCCAGTCTGTGCTTGGCCACTTACAGT	0.2896	0.4137	G	21.07	4.426e-06	0.5777	0.12	0.4566	0.7309	Imputed
3	rs35214899:146266811:C:T	146266811	T	0.1377	0.2393	C	21.06	4.453e-06	0.5073	0.1494	0.3785	0.68	Imputed
3	rs9876886:146267662:A:G	146267662	G	0.1377	0.2393	A	21.06	4.453e-06	0.5073	0.1494	0.3785	0.68	Imputed
6	rs2301220:33038766:C:T	33038766	C	0.2873	0.4115	T	21.05	4.474e-06	0.5766	0.1205	0.4553	0.7302	Imputed
6	rs4711317:33090305:G:A	33090305	A	0.3199	0.4472	G	21.04	4.495e-06	0.5816	0.1186	0.4609	0.7337	Imputed
6	rs4711318:33090336:G:A	33090336	A	0.3199	0.4472	G	21.04	4.495e-06	0.5816	0.1186	0.4609	0.7337	Imputed
6	rs59342333:33029599:G:A	33029599	G	0.2751	0.399	A	21.02	4.554e-06	0.5716	0.1226	0.4495	0.7267	Imputed
10	rs144998273:72611185:C:CTA	72611185	CTA	0.1361	0.05882	C	20.98	4.646e-06	2.52	0.2073	1.679	3.783	Imputed
6	6:32590613:C:A	32590613	A	0.1918	0.1003	C	20.96	4.69e-06	2.129	0.1675	1.533	2.956	Imputed
6	rs117222852:32575843:C:A	32575843	A	0.1918	0.1003	C	20.96	4.69e-06	2.129	0.1675	1.533	2.956	Imputed
6	rs117316263:32579695:A:G	32579695	G	0.1918	0.1003	A	20.96	4.69e-06	2.129	0.1675	1.533	2.956	Imputed
6	rs117356394:32582897:A:G	32582897	G	0.1918	0.1003	A	20.96	4.69e-06	2.129	0.1675	1.533	2.956	Imputed
6	rs117375124:32597334:C:T	32597334	T	0.1918	0.1003	C	20.96	4.69e-06	2.129	0.1675	1.533	2.956	Imputed
6	rs117463603:32580502:G:A	32580502	A	0.1918	0.1003	G	20.96	4.69e-06	2.129	0.1675	1.533	2.956	Imputed
6	rs117477741:32583910:A:T	32583910	T	0.1918	0.1003	A	20.96	4.69e-06	2.129	0.1675	1.533	2.956	Imputed
6	rs117503706:32583876:G:A	32583876	A	0.1918	0.1003	G	20.96	4.69e-06	2.129	0.1675	1.533	2.956	Imputed
6	rs117552038:32583937:C:G	32583937	G	0.1918	0.1003	C	20.96	4.69e-06	2.129	0.1675	1.533	2.956	Imputed
6	rs118114174:32599297:T:G	32599297	G	0.1918	0.1003	T	20.96	4.69e-06	2.129	0.1675	1.533	2.956	Imputed
6	rs148175141:32587334:G:A	32587334	A	0.1918	0.1003	G	20.96	4.69e-06	2.129	0.1675	1.533	2.956	Imputed
6	rs201648884:32587042:T:G	32587042	G	0.1918	0.1003	T	20.96	4.69e-06	2.129	0.1675	1.533	2.956	Imputed
6	rs34224986:32591812:T:C	32591812	C	0.1918	0.1003	T	20.96	4.69e-06	2.129	0.1675	1.533	2.956	Imputed
6	rs35634576:32586148:T:C	32586148	C	0.1918	0.1003	T	20.96	4.69e-06	2.129	0.1675	1.533	2.956	Imputed
6	rs75315102:32577932:A:G	32577932	G	0.1918	0.1003	A	20.96	4.69e-06	2.129	0.1675	1.533	2.956	Imputed
6	rs78351146:32591915:C:A	32591915	A	0.1918	0.1003	C	20.96	4.69e-06	2.129	0.1675	1.533	2.956	Imputed
3	rs13099587:146268616:G:A	146268616	A	0.1044	0.1971	G	20.95	4.707e-06	0.4751	0.165	0.3439	0.6564	Imputed
3	rs34009190:146266958:A:T	146266958	T	0.1044	0.1971	A	20.95	4.707e-06	0.4751	0.165	0.3439	0.6564	Imputed
3	rs1061307	146262344	T	0.09748	0.1877	C	20.95	4.725e-06	0.4674	0.1688	0.3358	0.6507	Genotyped
6	rs742870:33076268:T:C	33076268	T	0.1962	0.3088	C	20.94	4.732e-06	0.5463	0.133	0.4209	0.709	Imputed
6	rs7773858	70244679	A	0.1085	0.04045	G	20.92	4.778e-06	2.887	0.2407	1.801	4.627	Genotyped
12	rs1828682:16515011:T:C	16515011	C	0.03481	0.09967	T	20.91	4.822e-06	0.3258	0.2561	0.1972	0.5382	Imputed
6	rs3129205:33125859:G:T	33125859	G	0.2925	0.4159	T	20.89	4.859e-06	0.5806	0.1194	0.4594	0.7337	Imputed
6	rs3116964:33120720:C:T	33120720	C	0.294	0.4175	T	20.87	4.928e-06	0.5811	0.1193	0.46	0.7342	Imputed
6	6:33035992:C:CT	33035992	C	0.2717	0.3944	CT	20.82	5.034e-06	0.5729	0.1226	0.4505	0.7285	Imputed
6	rs3179776:33036003:G:C	33036003	G	0.2717	0.3944	C	20.82	5.034e-06	0.5729	0.1226	0.4505	0.7285	Imputed
6	rs3179777:33035986:T:C	33035986	T	0.2717	0.3944	C	20.82	5.034e-06	0.5729	0.1226	0.4505	0.7285	Imputed
6	rs6913744:33093300:A:G	33093300	G	0.1903	0.301	A	20.78	5.145e-06	0.5457	0.1338	0.4198	0.7093	Imputed
6	rs6913896:33093365:A:T	33093365	T	0.1903	0.301	A	20.78	5.145e-06	0.5457	0.1338	0.4198	0.7093	Imputed
6	rs9277729:33091874:T:A	33091874	A	0.1903	0.301	T	20.78	5.145e-06	0.5457	0.1338	0.4198	0.7093	Imputed
6	rs9277731:33092131:G:A	33092131	A	0.1903	0.301	G	20.78	5.145e-06	0.5457	0.1338	0.4198	0.7093	Imputed
6	rs9277733:33092379:T:C	33092379	C	0.1903	0.301	T	20.78	5.145e-06	0.5457	0.1338	0.4198	0.7093	Imputed
6	rs9277735:33092477:C:A	33092477	A	0.1903	0.301	C	20.78	5.145e-06	0.5457	0.1338	0.4198	0.7093	Imputed
6	rs9277742:33092689:C:T	33092689	T	0.1903	0.301	C	20.78	5.145e-06	0.5457	0.1338	0.4198	0.7093	Imputed
6	rs9277743:33092724:C:A	33092724	A	0.1903	0.301	C	20.78	5.145e-06	0.5457	0.1338	0.4198	0.7093	Imputed
6	rs9277744:33092824:C:T	33092824	T	0.1903	0.301	C	20.78	5.145e-06	0.5457	0.1338	0.4198	0.7093	Imputed
6	rs9277745:33092962:G:T	33092962	T	0.1903	0.301	G	20.78	5.145e-06	0.5457	0.1338	0.4198	0.7093	Imputed
6	rs9277747:33093851:C:G	33093851	G	0.1903	0.301	C	20.78	5.145e-06	0.5457	0.1338	0.4198	0.7093	Imputed
6	rs9277748:33093876:A:G	33093876	G	0.1903	0.301	A	20.78	5.145e-06	0.5457	0.1338	0.4198	0.7093	Imputed
6	rs9277750:33093964:T:G	33093964	G	0.1903	0.301	T	20.78	5.145e-06	0.5457	0.1338	0.4198	0.7093	Imputed
6	rs9277757:33095028:G:A	33095028	A	0.1903	0.301	G	20.78	5.145e-06	0.5457	0.1338	0.4198	0.7093	Imputed
6	rs9277759:33095234:T:C	33095234	C	0.1903	0.301	T	20.78	5.145e-06	0.5457	0.1338	0.4198	0.7093	Imputed
6	rs9277760:33095312:A:G	33095312	G	0.1903	0.301	A	20.78	5.145e-06	0.5457	0.1338	0.4198	0.7093	Imputed
6	rs9282432:33091990:C:CT	33091990	CT	0.1903	0.301	C	20.78	5.145e-06	0.5457	0.1338	0.4198	0.7093	Imputed
6	rs35784892:32561236:C:G	32561236	G	0.1883	0.09772	C	20.77	5.188e-06	2.142	0.1698	1.536	2.987	Imputed
6	rs78933533:32604198:G:A	32604198	A	0.1946	0.1026	G	20.76	5.197e-06	2.113	0.1667	1.524	2.93	Imputed
3	rs1443827:146273572:C:T	146273572	T	0.1472	0.25	C	20.73	5.286e-06	0.5176	0.146	0.3888	0.6891	Imputed
6	rs113598139:33105086:C:CAG	33105086	C	0.235	0.3525	CAG	20.72	5.326e-06	0.5644	0.1263	0.4406	0.723	Imputed
6	rs9277837:33104532:C:T	33104532	C	0.235	0.3525	T	20.72	5.326e-06	0.5644	0.1263	0.4406	0.723	Imputed
6	rs9277859:33105740:A:G	33105740	A	0.235	0.3525	G	20.72	5.326e-06	0.5644	0.1263	0.4406	0.723	Imputed
6	rs9277860:33105755:A:G	33105755	A	0.235	0.3525	G	20.72	5.326e-06	0.5644	0.1263	0.4406	0.723	Imputed
6	rs9277863:33105995:T:A	33105995	T	0.235	0.3525	A	20.72	5.326e-06	0.5644	0.1263	0.4406	0.723	Imputed
6	rs1431403:33047031:T:C	33047031	T	0.2197	0.3355	C	20.69	5.395e-06	0.5577	0.1291	0.4331	0.7183	Imputed
6	6:33108170:GAGTA:G	33108170	GAGTA	0.2358	0.3528	G	20.66	5.489e-06	0.5663	0.1257	0.4426	0.7246	Imputed
6	rs3129239:33110568:G:A	33110568	G	0.2358	0.3528	A	20.66	5.489e-06	0.5663	0.1257	0.4426	0.7246	Imputed
6	rs3129244	33109845	A	0.2358	0.3528	G	20.66	5.489e-06	0.5663	0.1257	0.4426	0.7246	Genotyped
6	rs3129245:33109814:C:T	33109814	C	0.2358	0.3528	T	20.66	5.489e-06	0.5663	0.1257	0.4426	0.7246	Imputed
6	rs3129246:33109784:A:G	33109784	A	0.2358	0.3528	G	20.66	5.489e-06	0.5663	0.1257	0.4426	0.7246	Imputed
6	rs3129247:33109678:A:G	33109678	A	0.2358	0.3528	G	20.66	5.489e-06	0.5663	0.1257	0.4426	0.7246	Imputed
6	rs3129248	33109658	A	0.2358	0.3528	G	20.66	5.489e-06	0.5663	0.1257	0.4426	0.7246	Genotyped
6	rs3129250:33109397:G:C	33109397	G	0.2358	0.3528	C	20.66	5.489e-06	0.5663	0.1257	0.4426	0.7246	Imputed
6	rs3129256:33107139:T:C	33107139	T	0.2358	0.3528	C	20.66	5.489e-06	0.5663	0.1257	0.4426	0.7246	Imputed
6	rs3129257:33106957:G:A	33106957	G	0.2358	0.3528	A	20.66	5.489e-06	0.5663	0.1257	0.4426	0.7246	Imputed
6	rs9277885	33109747	T	0.2358	0.3528	C	20.66	5.489e-06	0.5663	0.1257	0.4426	0.7246	Genotyped
6	rs9277886:33109768:T:A	33109768	T	0.2358	0.3528	A	20.66	5.489e-06	0.5663	0.1257	0.4426	0.7246	Imputed
6	rs9277887:33109780:G:C	33109780	G	0.2358	0.3528	C	20.66	5.489e-06	0.5663	0.1257	0.4426	0.7246	Imputed
10	rs72816582:72578307:A:C	72578307	C	0.1345	0.05844	A	20.61	5.637e-06	2.504	0.2076	1.667	3.761	Imputed
6	rs66640614:33039899:G:C	33039899	C	0.5506	0.4223	G	20.59	5.695e-06	1.676	0.1141	1.34	2.096	Imputed
6	rs13196651:33039507:A:G	33039507	G	0.5505	0.4223	A	20.57	5.753e-06	1.675	0.114	1.339	2.095	Imputed
6	rs139024341:32573301:C:T	32573301	T	0.1909	0.1003	C	20.55	5.808e-06	2.115	0.1678	1.523	2.939	Imputed
6	rs184023713:32573182:C:T	32573182	T	0.1909	0.1003	C	20.55	5.808e-06	2.115	0.1678	1.523	2.939	Imputed
6	rs79572840:32560408:C:G	32560408	G	0.1909	0.1003	C	20.55	5.808e-06	2.115	0.1678	1.523	2.939	Imputed
6	rs79126782:33039756:G:A	33039756	A	0.5503	0.4223	G	20.55	5.81e-06	1.674	0.114	1.339	2.093	Imputed
6	rs9378176	33049309	G	0.4292	0.3058	A	20.52	5.906e-06	1.707	0.1185	1.353	2.153	Genotyped
1	rs7537971:115213826:G:A	115213826	A	0.03035	0.0918	G	20.47	6.06e-06	0.3097	0.2719	0.1817	0.5277	Imputed
3	rs9861142:146271762:G:T	146271762	T	0.1472	0.2492	G	20.46	6.081e-06	0.5199	0.146	0.3905	0.6921	Imputed
3	rs9865918:146272461:G:C	146272461	C	0.1472	0.2492	G	20.46	6.081e-06	0.5199	0.146	0.3905	0.6921	Imputed
3	rs977758:146276657:G:A	146276657	A	0.1472	0.2492	G	20.41	6.265e-06	0.5199	0.1462	0.3904	0.6924	Imputed
3	rs111696198:146272685:C:CA	146272685	CA	0.1484	0.2517	C	20.39	6.314e-06	0.5181	0.147	0.3884	0.6911	Imputed
6	6:33066594:A:G	33066594	A	0.1997	0.3107	G	20.36	6.422e-06	0.5536	0.1319	0.4275	0.7169	Imputed
6	rs7754362:33111028:A:C	33111028	A	0.2366	0.3528	C	20.35	6.463e-06	0.5687	0.1258	0.4444	0.7276	Imputed
6	rs187391604:32567361:T:C	32567361	C	0.1903	0.1003	T	20.34	6.492e-06	2.107	0.1677	1.517	2.927	Imputed
6	rs192167936:32567373:A:G	32567373	G	0.1903	0.1003	A	20.34	6.492e-06	2.107	0.1677	1.517	2.927	Imputed
6	rs71673300:32559641:CAG:C	32559641	C	0.1903	0.1003	CAG	20.34	6.492e-06	2.107	0.1677	1.517	2.927	Imputed
6	rs9277865:33106094:C:T	33106094	C	0.235	0.3515	T	20.33	6.506e-06	0.5668	0.1265	0.4423	0.7264	Imputed
6	rs9277866:33106109:A:G	33106109	A	0.235	0.3515	G	20.33	6.506e-06	0.5668	0.1265	0.4423	0.7264	Imputed
6	rs118008956:32582998:T:C	32582998	C	0.1918	0.1013	T	20.33	6.52e-06	2.106	0.1676	1.516	2.924	Imputed
6	rs139376177:33052580:AAAAGAAAGAATG:A	33052580	AAAAGAAAGAATG	0.2749	0.3967	A	20.33	6.52e-06	0.5767	0.1226	0.4535	0.7333	Imputed
6	rs9277736:33092512:A:T	33092512	T	0.1893	0.2987	A	20.33	6.529e-06	0.5481	0.1343	0.4213	0.7131	Imputed
6	rs66720176:33028988:T:C	33028988	T	0.277	0.3993	C	20.32	6.557e-06	0.5764	0.1227	0.4532	0.7332	Imputed
6	rs66780929:33029009:A:G	33029009	A	0.277	0.3993	G	20.32	6.557e-06	0.5764	0.1227	0.4532	0.7332	Imputed
6	rs9277529:33054675:C:G	33054675	C	0.2862	0.4097	G	20.29	6.668e-06	0.5777	0.1223	0.4545	0.7342	Imputed
6	rs930:33054656:A:C	33054656	A	0.2862	0.4097	C	20.29	6.668e-06	0.5777	0.1223	0.4545	0.7342	Imputed
3	rs7625713	146265311	A	0.1038	0.1942	G	20.28	6.7e-06	0.4805	0.1651	0.3477	0.6641	Genotyped
6	rs3130151:33115024:T:C	33115024	T	0.2311	0.3463	C	20.27	6.72e-06	0.5675	0.1265	0.4429	0.7272	Imputed
3	rs7615988:146269409:A:G	146269409	G	0.146	0.2475	A	20.27	6.733e-06	0.5198	0.1467	0.3899	0.693	Imputed
6	rs13213149:33039686:T:C	33039686	T	0.2739	0.395	C	20.26	6.751e-06	0.5777	0.1224	0.4545	0.7344	Imputed
6	rs13213165:33039729:T:G	33039729	T	0.2739	0.395	G	20.26	6.751e-06	0.5777	0.1224	0.4545	0.7344	Imputed
6	rs34780193:33039719:A:G	33039719	A	0.2739	0.395	G	20.26	6.751e-06	0.5777	0.1224	0.4545	0.7344	Imputed
6	rs1810472:33083121:T:C	33083121	C	0.2028	0.3139	T	20.23	6.882e-06	0.5561	0.1313	0.4299	0.7193	Imputed
6	rs909800:33083202:C:T	33083202	T	0.2028	0.3139	C	20.23	6.882e-06	0.5561	0.1313	0.4299	0.7193	Imputed
6	rs114620642:33029926:A:G	33029926	A	0.3157	0.4402	G	20.22	6.894e-06	0.5867	0.119	0.4647	0.7408	Imputed
6	rs118134198:33048735:C:G	33048735	G	0.4277	0.3049	C	20.18	7.037e-06	1.703	0.119	1.349	2.151	Imputed
6	rs2301223:33038546:C:T	33038546	T	0.5476	0.4205	C	20.17	7.104e-06	1.669	0.1143	1.334	2.088	Imputed
6	rs9405117	32602751	A	0.1918	0.1019	C	20.13	7.218e-06	2.091	0.1668	1.508	2.899	Genotyped
6	rs142544441:33031072:GAACA:G	33031072	G	0.5473	0.4205	GAACA	20.13	7.226e-06	1.667	0.1141	1.332	2.084	Imputed
6	rs79541122:33030076:G:C	33030076	C	0.5473	0.4205	G	20.13	7.226e-06	1.667	0.1141	1.332	2.084	Imputed
6	rs79786719:33031787:A:C	33031787	C	0.5473	0.4205	A	20.13	7.226e-06	1.667	0.1141	1.332	2.084	Imputed
6	rs79015944:33036318:T:C	33036318	C	0.5472	0.4205	T	20.12	7.287e-06	1.666	0.1141	1.332	2.083	Imputed
6	rs9277919	33125484	T	0.2783	0.3981	C	20.11	7.314e-06	0.5831	0.1208	0.4602	0.7388	Genotyped
3	rs13064509:146264779:A:G	146264779	G	0.1349	0.2336	A	20.1	7.345e-06	0.5118	0.151	0.3807	0.688	Imputed
6	rs60438747:33039146:A:T	33039146	T	0.5489	0.4223	A	20.07	7.477e-06	1.664	0.114	1.331	2.081	Imputed
10	rs10999568:72615941:T:G	72615941	G	0.1309	0.05682	T	20.07	7.484e-06	2.501	0.2101	1.656	3.775	Imputed
6	rs78103064:33038283:A:G	33038283	G	0.5487	0.4223	A	20.05	7.546e-06	1.663	0.1139	1.33	2.079	Imputed
6	6:33094968:TC:CC	33094968	CC	0.1714	0.2767	TC	20.05	7.563e-06	0.5407	0.1384	0.4122	0.7092	Imputed
6	rs201635610:33094969:CATT:TATT	33094969	TATT	0.1714	0.2767	CATT	20.05	7.563e-06	0.5407	0.1384	0.4122	0.7092	Imputed
6	rs9277732:33092196:C:T	33092196	T	0.1714	0.2767	C	20.05	7.563e-06	0.5407	0.1384	0.4122	0.7092	Imputed
6	rs9277753:33094809:C:T	33094809	T	0.1714	0.2767	C	20.05	7.563e-06	0.5407	0.1384	0.4122	0.7092	Imputed
6	rs9277756	33095026	A	0.1714	0.2767	G	20.05	7.563e-06	0.5407	0.1384	0.4122	0.7092	Genotyped
6	rs2301221:33038597:A:G	33038597	A	0.3105	0.4332	G	20.03	7.621e-06	0.5892	0.1186	0.467	0.7434	Imputed
6	rs57389774:33038579:A:G	33038579	A	0.3105	0.4332	G	20.03	7.621e-06	0.5892	0.1186	0.467	0.7434	Imputed
4	rs62321986:95344874:C:A	95344874	A	0.1283	0.05387	C	20.01	7.689e-06	2.585	0.2185	1.684	3.966	Imputed
4	rs62321987:95345791:A:G	95345791	G	0.1283	0.05387	A	20.01	7.689e-06	2.585	0.2185	1.684	3.966	Imputed
4	rs62321988:95349787:A:C	95349787	C	0.1283	0.05387	A	20.01	7.689e-06	2.585	0.2185	1.684	3.966	Imputed
3	rs2083866:146263354:C:T	146263354	T	0.1688	0.2753	C	20.01	7.707e-06	0.5345	0.1412	0.4053	0.7049	Imputed
3	rs9813199:146264285:A:G	146264285	G	0.1688	0.2753	A	20.01	7.707e-06	0.5345	0.1412	0.4053	0.7049	Imputed
6	rs201379120:33035666:G:T	33035666	T	0.5278	0.3986	G	20	7.733e-06	1.686	0.1171	1.34	2.121	Imputed
6	rs9277741:33092594:A:G	33092594	G	0.1903	0.2987	A	19.97	7.853e-06	0.5516	0.134	0.4242	0.7173	Imputed
6	rs6457718:33103827:A:G	33103827	A	0.2152	0.3279	G	19.97	7.865e-06	0.5621	0.1296	0.436	0.7247	Imputed
6	rs9277841:33104672:G:A	33104672	G	0.2152	0.3279	A	19.97	7.865e-06	0.5621	0.1296	0.436	0.7247	Imputed
6	rs191331798:32603758:T:C	32603758	C	0.1917	0.1019	T	19.97	7.881e-06	2.089	0.1673	1.505	2.9	Imputed
3	rs35901075:3315146:TTA:T	3315146	T	0.165	0.2708	TTA	19.94	8.006e-06	0.5323	0.1424	0.4027	0.7037	Imputed
12	rs9332939:16515230:A:T	16515230	A	0.03639	0.1	T	19.92	8.093e-06	0.3399	0.2517	0.2076	0.5566	Imputed
6	rs9277530:33054683:A:G	33054683	A	0.2862	0.4083	G	19.89	8.207e-06	0.5809	0.1223	0.4571	0.7382	Imputed
6	rs9277531:33054687:G:A	33054687	G	0.2862	0.4083	A	19.89	8.207e-06	0.5809	0.1223	0.4571	0.7382	Imputed
3	rs13080178:146265179:A:G	146265179	G	0.1048	0.1948	A	19.88	8.225e-06	0.4837	0.1651	0.3499	0.6686	Imputed
6	rs34544512:33046403:CA:C	33046403	CA	0.217	0.3306	C	19.87	8.289e-06	0.5614	0.1303	0.4349	0.7247	Imputed
3	rs977757	146276712	T	0.1761	0.2816	C	19.8	8.608e-06	0.5454	0.1372	0.4168	0.7137	Genotyped
6	rs139962369:33110503:C:CAA	33110503	C	0.2381	0.3528	CAA	19.72	8.945e-06	0.5734	0.1258	0.4481	0.7338	Imputed
6	rs59416939:33038229:G:T	33038229	G	0.3115	0.4332	T	19.66	9.232e-06	0.5919	0.1187	0.4691	0.7469	Imputed
6	rs60038796:33038234:G:A	33038234	A	0.5459	0.4205	G	19.65	9.291e-06	1.657	0.1142	1.325	2.073	Imputed
6	rs114390018:33029384:C:T	33029384	C	0.2798	0.401	T	19.64	9.353e-06	0.5803	0.1233	0.4557	0.739	Imputed
6	rs116916694:33029385:A:G	33029385	A	0.2798	0.401	G	19.64	9.353e-06	0.5803	0.1233	0.4557	0.739	Imputed
12	rs3852576:16516279:A:G	16516279	A	0.03639	0.09935	G	19.63	9.382e-06	0.3424	0.2516	0.2091	0.5607	Imputed
6	rs28438582:33038850:C:T	33038850	C	0.2987	0.4209	T	19.62	9.434e-06	0.5861	0.1211	0.4623	0.743	Imputed
6	rs73400085:33038830:C:T	33038830	C	0.2987	0.4209	T	19.62	9.434e-06	0.5861	0.1211	0.4623	0.743	Imputed
6	rs3116971	33115062	C	0.2358	0.3495	T	19.59	9.581e-06	0.5744	0.1259	0.4488	0.7351	Genotyped
3	rs1079369:146262781:A:G	146262781	G	0.1336	0.2303	A	19.58	9.624e-06	0.5157	0.1512	0.3834	0.6936	Imputed
6	rs117353881:32604457:G:A	32604457	A	0.1946	0.1052	G	19.56	9.737e-06	2.056	0.1652	1.487	2.842	Imputed
6	rs1054025	33035771	C	0.5472	0.4223	T	19.56	9.771e-06	1.653	0.1139	1.322	2.066	Genotyped
6	rs1126533:33037640:C:T	33037640	T	0.5472	0.4223	C	19.56	9.771e-06	1.653	0.1139	1.322	2.066	Imputed
6	rs1126534:33037639:G:A	33037639	A	0.5472	0.4223	G	19.56	9.771e-06	1.653	0.1139	1.322	2.066	Imputed
6	rs73397922:33032306:C:T	33032306	T	0.5472	0.4223	C	19.56	9.771e-06	1.653	0.1139	1.322	2.066	Imputed
6	rs73400019:33034166:C:A	33034166	A	0.5472	0.4223	C	19.56	9.771e-06	1.653	0.1139	1.322	2.066	Imputed
6	rs75135538:33032282:T:C	33032282	C	0.5472	0.4223	T	19.56	9.771e-06	1.653	0.1139	1.322	2.066	Imputed
6	rs3116967	33115423	A	0.2374	0.3511	G	19.55	9.818e-06	0.5753	0.1256	0.4498	0.736	Genotyped
6	rs3116968:33115382:A:G	33115382	A	0.2374	0.3511	G	19.55	9.818e-06	0.5753	0.1256	0.4498	0.736	Imputed
6	rs3116969:33115326:A:G	33115326	A	0.2374	0.3511	G	19.55	9.818e-06	0.5753	0.1256	0.4498	0.736	Imputed
6	rs3116970:33115259:A:T	33115259	A	0.2374	0.3511	T	19.55	9.818e-06	0.5753	0.1256	0.4498	0.736	Imputed
6	rs3129219:33114623:G:T	33114623	G	0.2374	0.3511	T	19.55	9.818e-06	0.5753	0.1256	0.4498	0.736	Imputed
3	rs977759:146276607:C:T	146276607	T	0.1761	0.2808	C	19.53	9.921e-06	0.5473	0.1374	0.4181	0.7165	Imputed

## Sheet: Table S3
Table S3. List of SNPs selected for experimental validation using TaqMan genotyping assay
No	Chr	SNP	P-value	OR	95% CI	Annotation
1	3	rs35766154	7.39e-07	0.43	0.31-0.61	Imputed
2	3	rs1061307	5.92e-06	0.47	0.33-0.65	Genotyped
3	4	rs62321986	7.69e-06	2.58	1.68-3.96	Imputed
4	4	rs6843496	9.67e-05	2.19	1.46-3.28	Genotyped
5	6	rs7770370	8.06e-10	0.49	0.39-0.61	Genotyped
6	10	rs72816582	5.64e-06	2.5	1.66-3.76	Imputed
7	10	rs10999570	1.33e-05	2.37	1.59-3.54	Genotyped
8	12	rs1828682	4.82e-06	0.32	0.19-0.53	Imputed
9	12	rs7303782	0.000141	0.41	0.25-0.65	Genotyped

## Sheet: Table S4
Table S4. Results of association analysis of HLA-DPA1 alleles (with allele frequency > 1% in cases and/or controls) with chronic hepatitis B; statistically significant associations are shown with red color.
	observed				expected				chi-square test
HLA-DPA1 alleles	case		control		case		control
	Allele 1 (%)	Allele 2	Allele 1 (%)	Allele 2	Allele 1	Allele 2	Allele 1	Allele 2	χ2	P-value	OR	Pc
DPA1*01:03	169 (26.57%)	467	247 (40.23%)	367	211.66	424.34	204.34	409.66	26.23	3.02e-07	0.53	1.21e-06
DPA1*02:01	89 (13.99%)	547	90 (14.66%)	524	91.07	544.93	87.92	526.08	0.11	0.74	0.95	2.95
DPA1*02:02	348 (54.72%)	288	261 (42.51%)	353	309.86	326.14	299.14	314.86	18.64	1.58005e-05	1.63	6.32e-05
DPA1*04:01	28 (4.4%)	608	18 (2.93%)	596	23.4	612.6	22.6	591.4	1.91	0.16	1.52	0.67

## Sheet: Table S5
Table S5. Results of association analysis of HLA-DPB1 alleles (with allele frequency > 1% in cases and/or controls) with chronic hepatitis B; statistically significant associations are shown with red color.
	observed				expected				chi-square test
HLA-DPB1 alleles	case		control		case		control
	Allele 1 (%)	Allele 2	Allele 1 (%)	Allele 2	Allele 1	Allele 2	Allele 1	Allele 2	χ2	P-value	OR	Pc
DPB1*01:01	7 (1.11)	621	8 (1.34)	590	7.68	620.32	7.32	590.68	0.12	0.722398	0.83	9.39117
DPB1*02:01	53 (8.44)	575	92 (15.38)	506	74.27	553.73	70.73	527.27	14.16	0.000167163	0.5	0.00217312
DPB1*02:02	33 (5.25)	595	43 (7.19)	555	38.93	589.07	37.07	560.93	1.97	0.160005	0.71	2.08006
DPB1*03:01	31 (4.94)	597	44 (7.36)	554	38.42	589.58	36.58	561.42	3.12	0.0769798	0.65	1.00074
DPB1*04:01	46 (7.32)	582	61 (10.2)	537	54.81	573.19	52.19	545.81	3.18	0.0745326	0.69	0.968924
DPB1*04:02	20 (3.18)	608	25 (4.18)	573	23.05	604.95	21.95	576.05	0.86	0.353954	0.75	4.6014
DPB1*05:01	243 (38.7)	385	160 (26.76)	438	206.43	421.57	196.57	401.43	19.78	8.66525e-06	1.72	0.000112648
DPB1*09:01	7 (1.11)	621	11 (1.84)	587	9.22	618.78	8.78	589.22	1.11	0.291558	0.6	3.79025
DPB1*13:01	113 (17.99)	515	72 (12.04)	526	94.76	533.24	90.24	507.76	8.47	0.00360318	1.6	0.0468413
DPB1*14:01	16 (2.55)	612	20 (3.34)	578	18.44	609.56	17.56	580.44	0.68	0.408835	0.75	5.31485
DPB1*21:01	27 (4.3)	601	24 (4.01)	574	26.12	601.88	24.88	573.12	0.06	0.802064	1.07	10.4268
DPB1*28:01	8 (1.27)	620	9 (1.5)	589	8.71	619.29	8.29	589.71	0.12	0.72939	0.84	9.48207
DPB1*31:01	8 (1.27)	620	8 (1.34)	590	8.2	619.8	7.8	590.2	0.009	0.921493	0.95	11.9794

## Sheet: Table S6
Table S6. Results of association analysis of HLA-DQB1 alleles (with allele frequency > 1% in cases and/or controls) with chronic hepatitis B; statistically significant associations are shown with red color.
	observed				expected				chi-square test
HLA-DQB1 alleles	case		control		case		control
	Allele 1 (%)	Allele 2	Allele 1 (%)	Allele 2	Allele 1	Allele 2	Allele 1	Allele 2	χ2	P-value	OR	Pc
DQB1*02:01	40 (6.34)	590	42 (6.86)	570	41.59	588.41	40.41	571.59	0.13	0.715581	0.92	8.58697
DQB1*02:02	39 (6.19)	591	34 (5.55)	578	37.03	592.97	35.97	576.03	0.22	0.634347	1.12	7.61217
DQB1*03:01	118 (18.73)	512	113 (18.46)	499	117.17	512.83	113.83	498.17	0.01	0.904088	1.01	10.8491
DQB1*03:02	21 (3.33)	609	40 (6.53)	572	30.94	599.06	30.06	581.94	6.81	0.00902546	0.49	0.108305
DQB1*03:03	129 (20.47)	501	75 (12.25)	537	103.48	526.52	100.52	511.48	15.28	9.24471e-05	1.84	0.00110936
DQB1*04:01	27 (4.28)	603	24 (3.92)	588	25.87	604.13	25.13	586.87	0.10	0.746448	1.09	8.95738
DQB1*05:01	58 (9.20)	572	70 (11.43)	542	64.93	565.07	63.07	548.93	1.67	0.19594	0.78	2.35128
DQB1*05:02	122 (19.36)	508	102 (16.66)	510	113.62	516.38	110.38	501.62	1.52	0.216248	1.20	2.59498
DQB1*05:03	18 (2.85)	612	25 (4.08)	587	21.81	608.19	21.19	590.81	1.40	0.236686	0.69	2.84023
DQB1*06:01	45 (7.14)	585	52 (8.49)	560	49.20	580.8	47.8	564.20	0.79	0.374009	0.82	4.4881
DQB1*06:02	7 (1.11)	623	8 (1.30)	604	7.61	622.39	7.39	604.61	0.10	0.751792	0.84	9.0215
DQB1*06:09	1 (0.15)	629	12 (1.96)	600	6.59	623.41	6.41	605.59	9.73	0.00180973	0.07	0.0217167

## Sheet: Table S7
Table S7. Results of association analysis of two-locus HLA-DPA1-DPB1 haplotypes (with allele frequency > 1% in cases and/or controls) with chronic hepatitis B; statistically significant associations are shown with red color.
	observed				expected				chi-square test
HLA-DPA1-DPB1 haplotypes	case		control		case		control
	Allele 1 (%)	Allele 2	Allele 1 (%)	Allele 2	Allele 1	Allele 2	Allele 1	Allele 2	χ2	P-value	OR	Pc
DPA1*02:02-DPB1*02:02	32 (5.09)	596	42 (7.04)	554	37.97	590.03	36.03	559.97	2.05	0.1522	0.70	2.1308
DPA1*02:02-DPB1*31:01	8 (1.27)	620	8 (1.34)	588	8.2	619.8	7.79	588.21	0.01	0.916137	0.94	12.8259
DPA1*02:01-DPB1*13:01	51 (8.12)	577	37 (6.20)	559	45.15	582.85	42.85	553.15	1.67	0.19532	1.33	2.73448
DPA1*04:01-DPB1*13:01	20 (3.18)	608	10 (1.67)	586	15.39	612.61	14.61	581.39	2.90	0.0883558	1.92	1.23698
DPA1*01:03-DPB1*03:01	22 (3.50)	606	36 (6.04)	560	29.76	598.24	28.24	567.76	4.36	0.0367828	0.56	0.514959
DPA1*04:01-DPB1*28:01	8 (1.27)	620	8 (1.34)	588	8.21	619.79	7.79	588.21	0.01	0.916137	0.94	12.8259
DPA1*01:03-DPB1*02:01	47 (7.48)	581	87 (14.59)	509	68.75	559.25	65.25	530.75	15.8	6.78275e-05	0.47	0.000949585
DPA1*01:03-DPB1*21:01	27 (4.29)	601	24 (4.02)	572	26.17	601.83	24.83	571.17	0.05	0.811508	1.07	11.3611
DPA1*02:02-DPB1*05:01	237 (37.73)	391	158 (26.51)	438	202.66	425.34	192.34	403.66	17.64	2.66899e-05	1.68	0.000373659
DPA1*02:02-DPB1*03:01	7 (1.11)	621	8 (1.34)	588	7.7	620.3	7.3	588.7	0.13	0.717501	0.82	10.045
DPA1*01:03-DPB1*04:01	42 (6.68)	586	59 (9.89)	537	51.82	576.18	49.18	546.82	4.16	0.0412515	0.65	0.57752
DPA1*02:02-DPB1*13:01	42 (6.68)	586	23 (3.85)	573	33.35	594.65	31.65	564.35	4.86	0.0273848	1.78	0.383387
DPA1*02:01-DPB1*14:01	15 (2.38)	613	18 (3.02)	578	16.93	611.07	16.07	579.93	0.46	0.495301	0.78	6.93421
DPA1*01:03-DPB1*04:02	20 (3.18)	608	25 (4.19)	571	23.09	604.91	21.91	574.09	0.88	0.348007	0.75	4.8721

## Sheet: Table S8
Table S8. Results of association analysis of two-locus HLA-DPB1-DQB1 haplotypes (with allele frequency > 1% in cases and/or controls) with chronic hepatitis B; statistically significant associations are shown with red color.
	observed				expected				chi-square test
HLA-DPB1-DQB1 haplotypes	case		control		case		control
	Allele 1 (%)	Allele 2	Allele 1 (%)	Allele 2	Allele 1	Allele 2	Allele 1	Allele 2	χ2	P-value	OR	Pc
DPB1*04:01-DQB1*02:01	22 (3.54)	598	27 (4.54)	567	25.02	594.98	23.98	570.02	0.77	0.377564	0.77	6.4186
DPB1*05:01-DQB1*03:01	61 (9.83)	559	38 (6.39)	556	50.56	569.44	48.44	545.56	4.79	0.0285115	1.59	0.484695
DPB1*13:01-DQB1*03:01	10 (1.61)	610	11 (1.85)	583	10.72	609.28	10.27	583.73	0.10	0.749569	0.86	12.7427
DPB1*21:01-DQB1*03:01	12 (1.93)	608	14 (2.35)	580	13.28	606.72	12.72	581.28	0.25	0.612147	0.81	10.4065
DPB1*02:01-DQB1*03:02	11 (1.77)	609	22 (3.70)	572	16.85	603.15	16.15	577.85	4.27	0.0387687	0.46	0.659067
DPB1*05:01-DQB1*03:02	7 (1.12)	613	10 (1.68)	584	8.68	611.32	8.32	585.68	0.67	0.411149	0.66	6.98954
DPB1*02:01-DQB1*03:03	11 (1.77)	609	7 (1.17)	587	9.19	610.81	8.81	585.19	0.73	0.3906	1.51	6.64021
DPB1*05:01-DQB1*03:03	69 (11.12)	551	31 (5.21)	563	51.07	568.93	48.93	545.07	14.01	0.000180986	2.27	0.00308
DPB1*13:01-DQB1*03:03	22 (3.54)	598	11 (1.85)	583	16.85	603.15	16.15	577.85	3.30	0.0692015	1.94	1.17642
DPB1*05:01-DQB1*04:01	19 (3.06)	601	13 (2.18)	581	16.34	603.66	15.66	578.34	0.90	0.340915	1.41	5.79555
DPB1*13:01-DQB1*05:01	39 (6.29)	581	30 (5.05)	564	35.24	584.76	33.76	560.24	0.86	0.350989	1.26	5.96682
DPB1*02:01-DQB1*05:02	12 (1.93)	608	13 (2.18)	581	12.77	607.23	12.23	581.77	0.09	0.756282	0.88	12.8568
DPB1*02:02-DQB1*05:02	17 (2.74)	603	15 (2.52)	579	16.34	603.66	15.66	578.34	0.05	0.813758	1.08	13.8339
DPB1*05:01-DQB1*05:02	36 (5.80)	584	36 (6.06)	558	36.77	583.23	35.23	558.77	0.03	0.851338	0.95	14.4727
DPB1*13:01-DQB1*05:02	22 (3.54)	598	4 (0.67)	590	13.28	606.72	12.72	581.28	11.96	0.000542365	5.42	0.00922
DPB1*21:01-DQB1*05:02	14 (2.25)	606	3 (0.50)	591	8.68	611.32	8.32	585.68	6.75	0.00936491	4.55	0.159203
DPB1*05:01-DQB1*06:01	19 (3.06)	601	14 (2.35)	580	16.85	603.15	16.15	577.85	0.57	0.44851	1.30	7.62467

## Sheet: Table S9
Table S9. Results of association analysis of three-locus HLA-DPA1-DPB1-DQB1 haplotypes (with allele frequency > 1% in cases and/or controls) with chronic hepatitis B; statistically significant associations are shown with red color.
	observed				expected				chi-square test
HLA-DPA1-DPB1-DQB1 haplotypes	case		control		case		control
	Allele 1 (%)	Allele 2	Allele 1 (%)	Allele 2	Allele 1	Allele 2	Allele 1	Allele 2	χ2	P-value	OR	Pc
DPA1*02:02-DPB1*05:01-DQB1*03:03	63 (10.3)	547	31 (5.25)	559	47.78	562.22	46.22	543.78	10.6	0.00107515	2.07	0.00967638
DPA1*02:02-DPB1*05:01-DQB1*03:01	59 (9.67)	551	37 (6.27)	553	48.8	561.2	47.2	542.8	4.71	0.0299307	1.60	0.269377
DPA1*01:03-DPB1*04:01-DQB1*02:01	22 (3.60)	588	27 (4.57)	563	24.91	585.09	24.09	565.91	0.72	0.396119	0.78	3.56507
DPA1*01:03-DPB1*21:01-DQB1*03:01	12 (1.96)	598	13 (2.20)	577	12.71	597.29	12.29	577.71	0.08	0.774594	0.89	6.97134
DPA1*02:02-DPB1*05:01-DQB1*06:01	21 (3.44)	589	15 (2.54)	575	18.3	591.7	17.7	572.3	0.83	0.360749	1.36	3.24674
DPA1*02:01-DPB1*13:01-DQB1*05:01	20 (3.27)	590	19 (3.22)	571	19.825	590.175	19.175	570.825	0.00	0.954556	1.01	8.591
DPA1*02:02-DPB1*05:01-DQB1*05:02	38 (6.22)	572	34 (5.76)	556	36.6	573.4	35.4	554.6	0.11	0.733556	1.08	6.60201
DPA1*02:02-DPB1*02:02-DQB1*05:02	17 (2.78)	593	13 (2.20)	577	15.25	594.75	14.75	575.25	0.41	0.517477	1.27	4.65729
DPA1*02:02-DPB1*05:01-DQB1*04:01	20 (3.27)	590	12 (2.03)	578	16.27	593.73	15.73	574.27	1.79	0.180871	1.63	1.62784

## Sheet: Table S10
Table S10. Primers for production of Luciferase assay constructs.
SNP_ID	Primer Name	Sequence (5' -> 3')
rs1061307	rs1061307-Luc-F	GTTGGTAAAGCCACCCAGACCCTTTTCCGG
	rs1061307-Luc-R	TTTGGCATCTTCCATGATTAAAACAGTTCTCTGGCTGCCGCTG
